# Supplementary material for: Supracolloidal Self‐Assembly of Divalent Janus 3D DNA Origami via Programmable Multivalent Host/Guest Interactions
Source: PubMed Central journal article supplement — Angew Chem Int Ed Engl. 2020 Feb 4;59(14):5515–20. doi: 10.1002/anie.201911795 (PMC7154728; doi:10.1002/anie.201911795), 2020-02-04
Supplement: ANIE-59-5515-s001.pdf [file ANIE-59-5515-s001.pdf]

Supporting Information

**Supracolloidal Self-Assembly of Divalent Janus 3D DNA Origami via Programmable Multivalent Host/Guest Interactions**

*Sebastian Loescher and Andreas Walther\**

anie\_201911795\_sm\_miscellaneous\_information.pdf

## Materials

Single stranded DNA (ssDNA) staples were bought from Integrated DNA Technologies IDT and shipped in pH 8 buffer. HPLC purified functional ssDNAs were bought from IDT (Amine) or biomers.net (DBCO-oligomers) and shipped as lyophilized products. Mono-azido beta cyclodextrin was bought from cyclolab.hu. 1-Adamantanecarbonyl chloride, magnesium acetate tetrahydrate, *N*-hydroxysuccinimide, sodium phosphate monobasic and sodium phosphate dibasic were bought from Sigma Aldrich. Agarose (low EEO) was bought from AppliChem. SYBR® gold stain for gel-electrophoresis, nuclease free water (ambion), 1 M MgCl<sub>2</sub> solution, 5 M NaCl solution and TE buffer (biomolecular grade, pH 8.0) were purchased from Thermo Fisher Scientific. Uranyl acetate (>98 %) and carbon-coated copper TEM grids were purchased from EMS.

The modified TE5 buffer consists of Tris(hydroxymethyl)-aminomethan (5 mM Tris, 1 mM EDTA, pH 8.4, 5 mM NaCl, 5 mM Mg<sup>2+</sup>). The PB10 phosphate buffer consists of a mixture of phosphate monobasic and phosphate dibasic set to a pH of 7.2 at 10 mM total concentration.

**Table 1.** List of ssDNA strands used for the attachment of adamantane and  $\beta$ CD functionality.

| Sequence        | 5'-modification | 3'-modification |
|-----------------|-----------------|-----------------|
| GCT GTG CGA CAA | DBCO            |                 |
| AAC AGC GTG TCG |                 | DBCO            |
| GCT GTG CGA CAA | /5AmMC6/        |                 |
| AAC AGC GTG TCG |                 | /3AmMC6/        |

DNA concentrations were determined by a ScanDrop spectrophotometer (and a Hellma TrayCell® 0.2 and 1 mm path length), using the corrected absorption at 260 nm and an averaged extinction coefficient.

HPLC purification was performed on a Dionex HPLC UltiMate 3000 Liquid Chromatography system with integrated single wavelength UV detection unit. Oligomers were separated on a DNAPac™ RP HPLC column bought from Thermo Fisher Scientific. Functional ssDNA oligomers were purified using a gradient of two on-line degassed solvents (A, B). The injection volume was usually around 100  $\mu$ L aqueous solution.

Solvent A: triethylamin/acetic acid pH 7.8 at 100 mM (TEAA) with 5% acetonitrile (MeCN)

Solvent B: MeCN

The commonly used gradient ran from 100% A and 0% B to 50% A and 50%B for 45 minutes and following to 10% A and 90% B in another 15 minutes. The flowrate was 0.2 mL/min at 60 °C while the detection of oligomers was done at 260 nm continuous flow absorption. Collected sample were freeze-dried and resuspended in the desired buffer and final concentration was determined by UV-VIS spectroscopy.

MALDI-ToF measurements were performed using a matrix of 3-hydroxypicolinic acid on a Bruker Autoflex III TOF/TOF in linear mode.

### 3D DNA Origami folding

Stock solutions of core-staple strands and functional strands were prepared (50  $\mu$ M). The amount for a final staple strand concentration of 100 nM was added into a tube containing the scaffold for a final concentration of 20 nM. NaCl was added to a final concentration of 5 mM and MgCl<sub>2</sub> to 20 mM and remaining volume was added as MQ-water. A typical folding reaction was performed on a scale of 100  $\mu$ L using a thermal ramp in the thermocycler: 80 °C for 15 min, 79-66 °C at 5 min/°C, 65-61 °C at 30 min/°C, 60-30 °C at 2 h/°C, final temperature 4 °C. The folded reaction mixture was purified by spin-filtration using Amicon 100k MWCO filters (10k rcf, 5 min, 25 °C and recover at 3k rcf, 2 min) and washed against TE5 buffer. The folded origami were analyzed by agarose gel electrophoresis (1 wt%, rotisafe dye, 5 V/cm for 180 min, 10 °C). Agarose gels were post-stained using SYBR® gold DNA stain.

Imaging of the origami was performed by transmission electron microscopy using a FEI Talos 120C at 120 kV operating voltage. Origami were deposit on glow discharged TEM grids and were negatively stained employing uranyl acetate (1wt%) directly onto the grid.

## Synthesis of host/guest ssDNA motifs

To a stirred suspension of 1-adamantanecarbonyl chloride (80 mg, 0.4 mmol) and *N*-hydroxy succinimide (230 mg, 2.0 mmol) in anhydrous DCM (2 ml) triethylamine (40 mg) was added at room temperature under argon. After 45 min, the precipitated urea was removed by filtration and the solvent removed in vacuo. The white solid was used without further purification.

Amine-terminated ssDNA oligomers (300  $\mu$ M) in phosphate buffer pH 7.2/DMSO (20:80v/v%) were coupled to adamantane-NHS (7.5 mM, 25 equiv.) in presence of triethylamine (10  $\mu$ L) at 37  $^{\circ}$ C for 24 h. The DMSO was removed by freeze-drying and the functional ssDNA oligomers were dissolved with MQ-water and subsequently purified by HPLC.

DBCO-modified oligomers (100  $\mu$ M) in phosphate buffer (10 mM at pH 7.2) were incubated with mono-azide  $\beta$ CD (1.6 mM, 20 equiv.) for 24 h at 37  $^{\circ}$ C. The reaction was purified by HPLC.

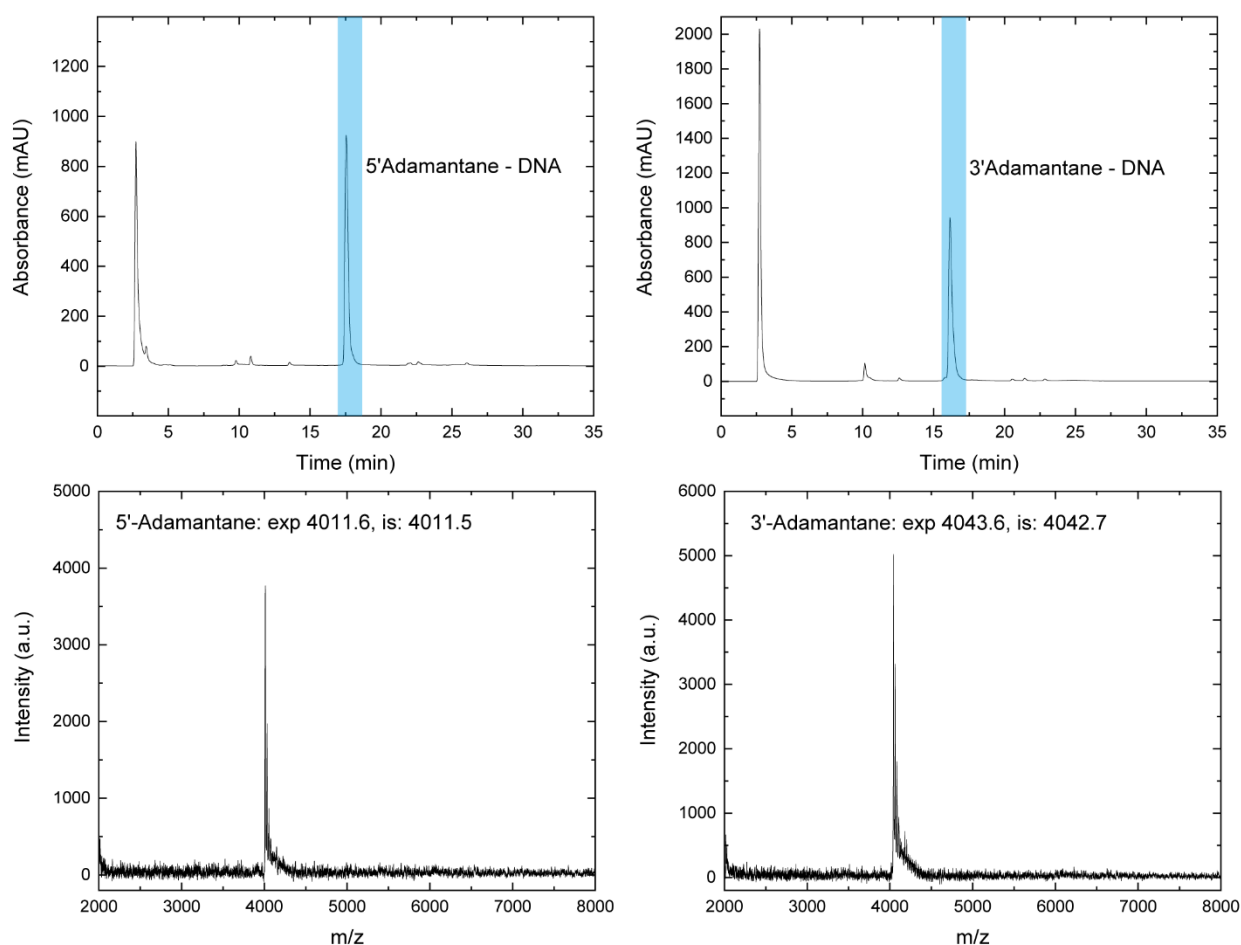

**Figure S1.** Top: 5' and 3' adamantane functionalized ssDNA HPLC traces. Blue shaded rectangle depicts collected fraction during purification. Bottom: Respective MALDI-ToF mass spectra.

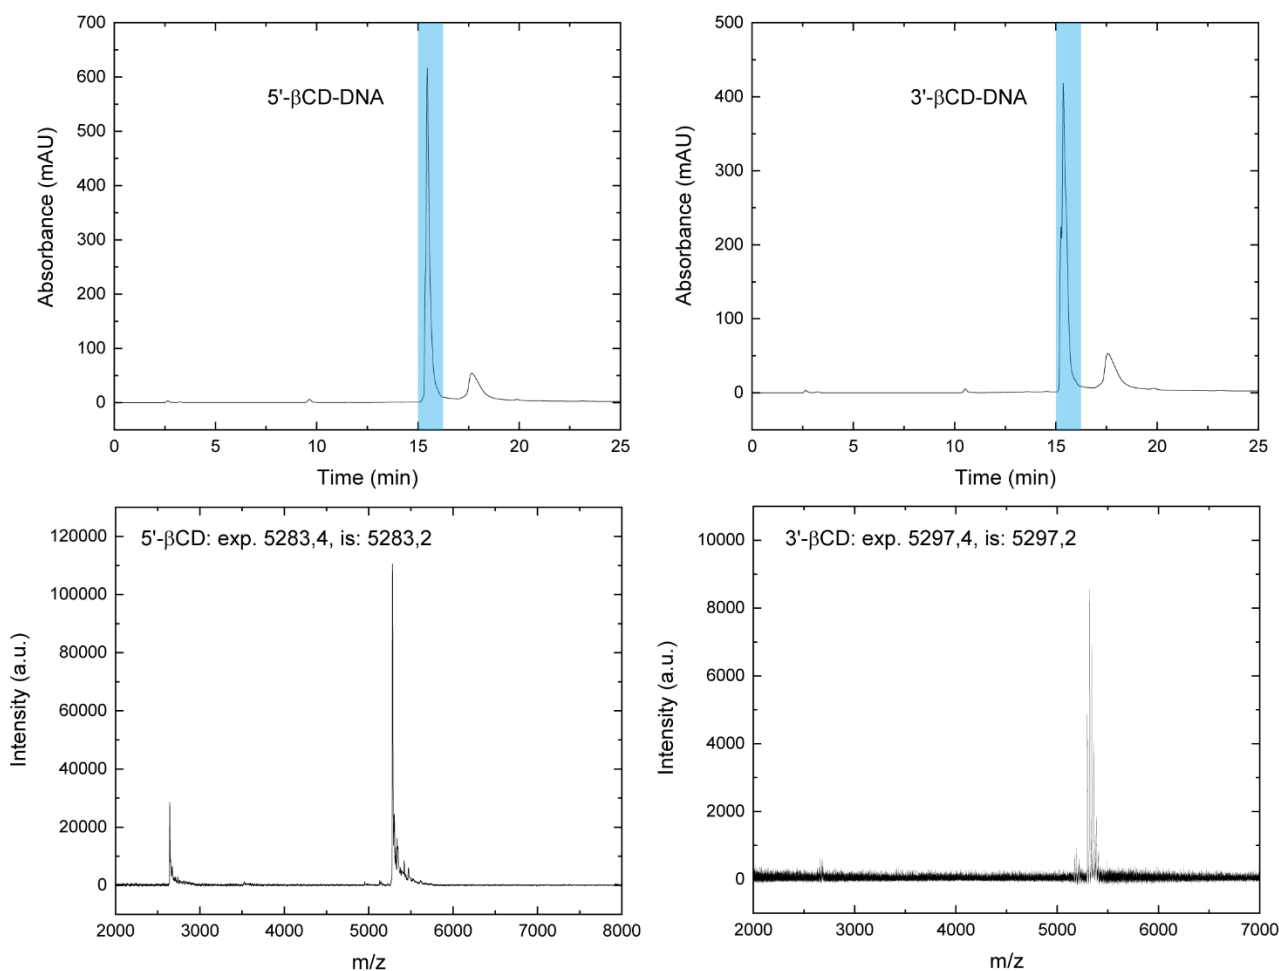

**Figure S2.** Top: 5' and 3' βCD functionalized ssDNA HPLC traces. Blue shaded rectangle depicts collected fraction during purification. Bottom: Respective MALDI-ToF mass spectra.

### *Supracolloidal self-assembly*

Supracolloidal polymerization was triggered by addition of a twofold excess of both host- and guest functional ssDNA strands to purified DNA origami (20 nM) with different amounts of docking strands at the two patch sides. The solutions were incubated in a thermoshaker at 20 °C and 300 rpm.

Supracolloidal co-polymerization was done by splitting a purified solution of docking strand-modified origami solution in two (by volume) and addition of two functional host-ssDNA in one solution and two guest-ssDNA in the other solution. After incubation for 10 min the solutions were combined in the indicated volume ratios.

### *Break of formed assemblies by addition of Adm-PEG*

Water soluble pegylated Adm was synthesized following a literature report.<sup>[1]</sup> The Adm-PEG was added as a concentrated solution in DMSO to the formed origami fibrils. A reference experiment adding only DMSO (5 v/v%) to the origami fibrils did not influence the degree of polymerization.

### *Salt-switch of Supracolloidal fibrils*

The salinity was lowered by spin filtration to a concentration of  $Mg^{2+}$  (1 mM). After TEM imaging, the  $[Mg^{2+}]$  was increased again to 10 mM and after 1h the original degree of polymerization was restored. A reference experiment was conducted to exclude loss of fibrils during spin-filtration using a buffer containing 10 mM  $[Mg^{2+}]$ . Indeed spin filtration at 10 mM does not lead to breakage of fibrils.

### Estimation of observed binding constants by statistical TEM analysis of dimers

Following a recently published method by Turberfield and co-workers<sup>[2]</sup> we estimated the binding constants of the four connector density origami by statistical analysis of dimer formation. To this end, we functionalized the origami only with Adm or  $\beta$ CD moieties on one side respectively (figure S3a) and removed excess of unbound host or guest strands. The origami were then mixed in equal ratios at 4 different concentrations (1, 2, 5, 10 nM total concentration, Figure S3b). After 24 h (near equilibrium condition) the ratio between monomers and dimers was analyzed by TEM (150-500 counted species per concentration) and fractions of dimers were plotted against free monomer origami. The  $K_d$  constant can be evaluated from a linear fit (in nM) (figure S3c). The value for  $K_a$  does not increase linearly with increasing number of connectors (figure S3d), but shows some upturn indicative of the cooperativity of the multivalent binding.

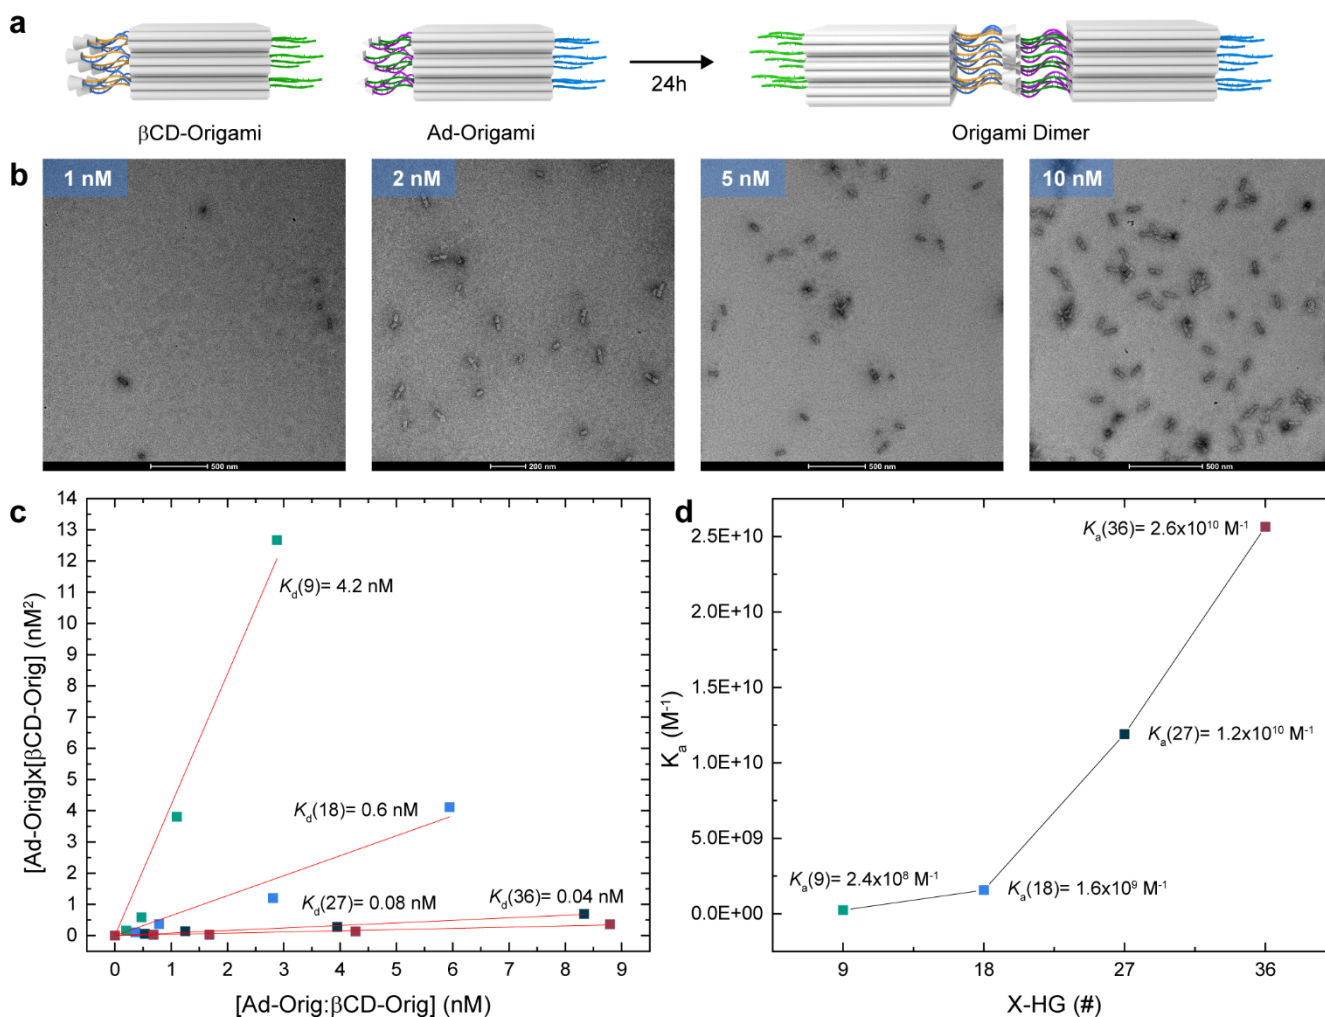

**Figure S3.** Estimation of the binding constant by statistical analysis of dimer formation. (a) Monofunctional Adm- and  $\beta$ CD-Origami can form dimers in solution. (b) A concentration series was made with [Adm-Orig]=[ $\beta$ CD-Orig]= x nM and ratios of monomer/dimer were analyzed by TEM. (c) The dissociation constant was estimated by a linear fit of dimer vs. monomer fractions. (d)  $K_a = (1/K_d)$  plotted as a function of the connector densities.

# DNA Origami Cuboid Folding Map

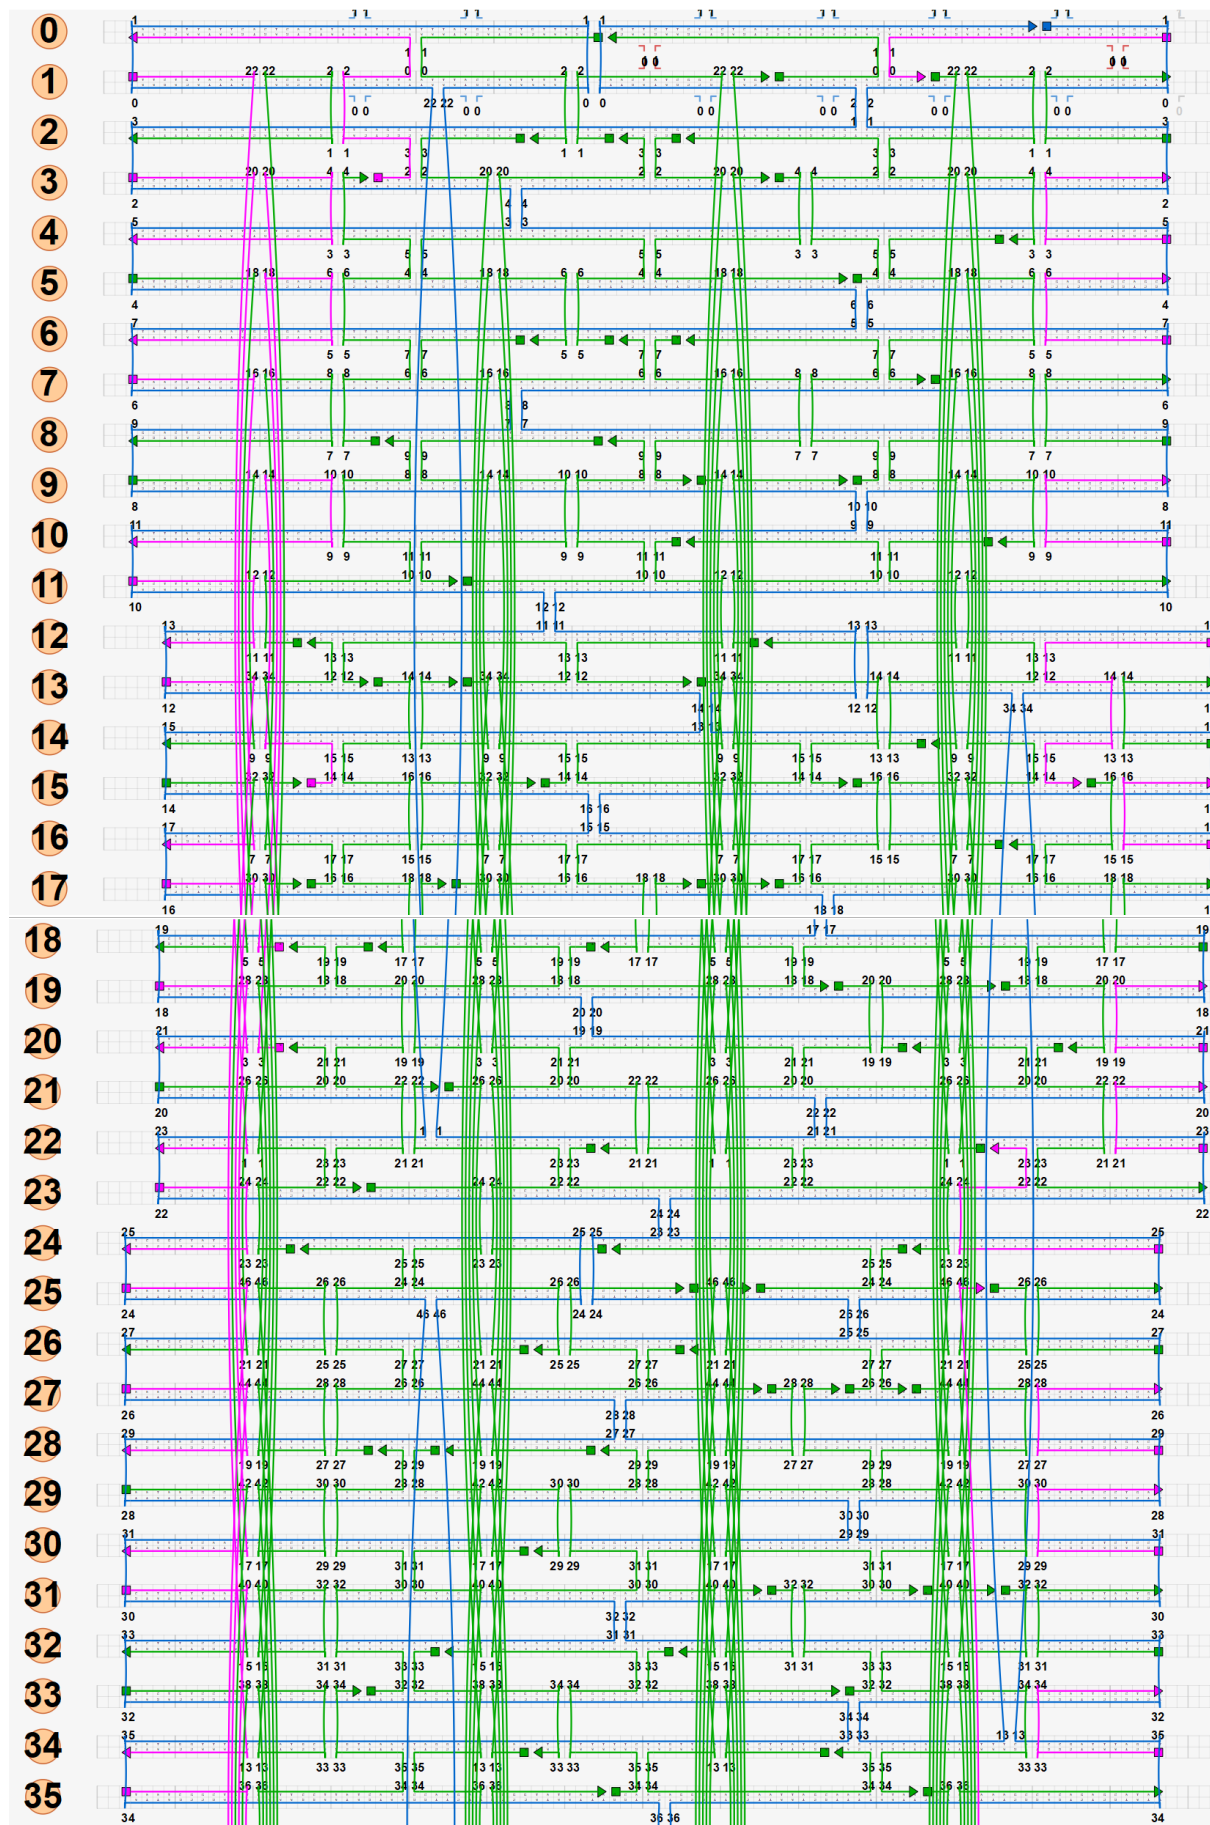



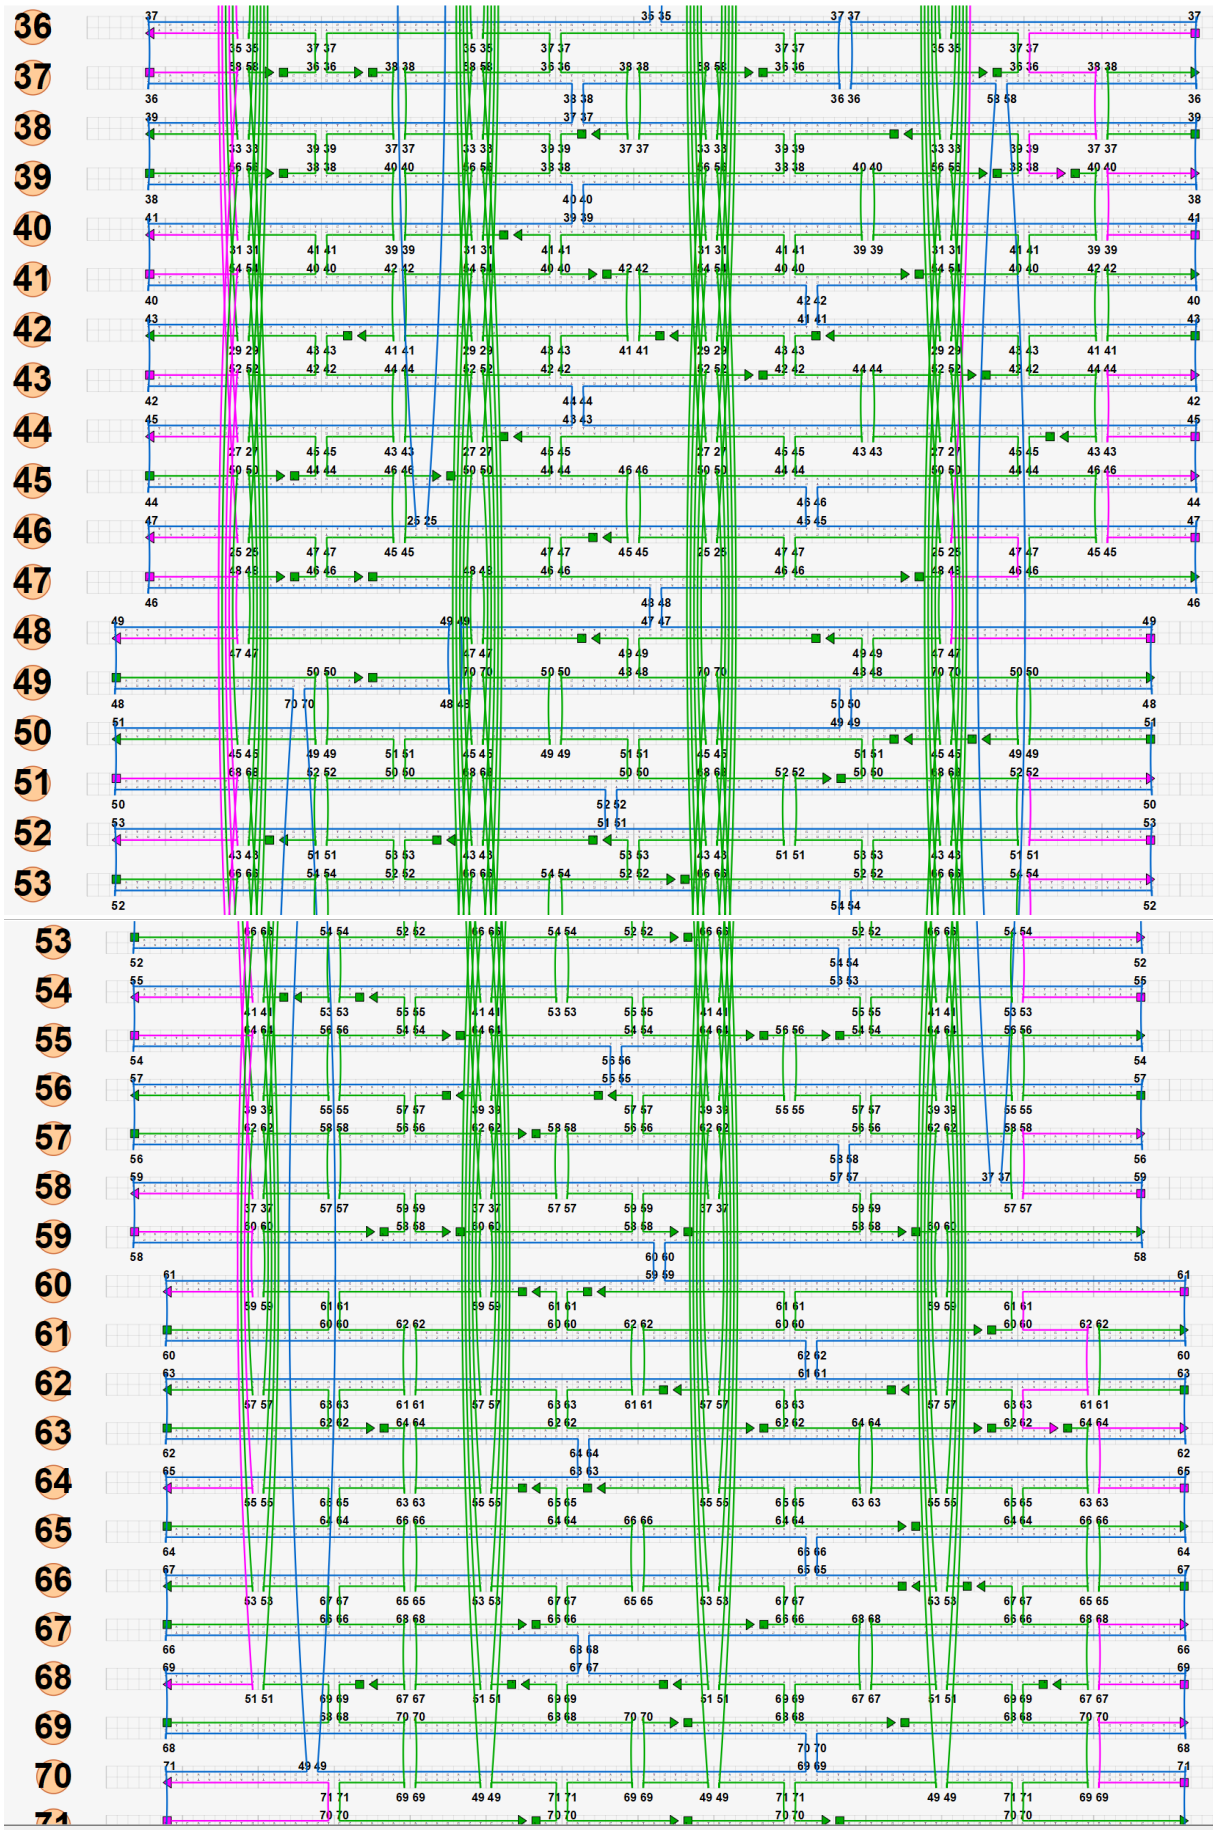

Figure S4. Overview of the strand design of an exemplary 3D DNA origami colloid used in this study.

## Staple Strands

**Table 2.** Sequences of used ssDNA staple strands.

| Sequences (5'-3')                                                 | #Bases |
|-------------------------------------------------------------------|--------|
| ATA AGT GCC GAT ATG TAA GAG ACT ACC TTT TAT AG                    | 35     |
| CGT GCC CGC TTT CCA GAA TCG GCC AAG GAG TCT TT                    | 35     |
| CCA TCG GCT ATA ATA TGA ACG CGC CTG TTT ACA AA                    | 35     |
| CTG ACT ATT TTG CAC CCA TTC ATT CTT GAT TCC CA                    | 35     |
| AAA GTC TTT CCC CTC AGA GCC ACC ACC CTC AAT CA                    | 35     |
| AAG TGC CCT GAC ATT GTA CAA TTT TAG GAT AAT AG                    | 35     |
| ATT ATT TGC AAT ACT TCA TCT AAA AGC GGA GTG AG                    | 35     |
| AGG TCA GAA ATA AAG AAA ATA ATC CCC AGA CGT AA                    | 35     |
| CAA CAG TTG ACA AAT ATA GCC AGC TGA GGC GAC TG                    | 35     |
| AGA GAG ATA GGG CGA CAG GTG AAT TAT CAC CCA GCA AAA ATA GCA ATA A | 49     |
| CTA ACG AGC GCC TTA ACG CGA GGT AGC AAG CAA AT                    | 35     |
| GCA TTA GCA AAC GCC TGA TAA ATT GCG CGA CCT GCT                   | 36     |
| GCC AAA AGG AAA CCC TCG GTT TTC CGA AAG GGG GA                    | 35     |
| ATC ATT GTG AAC CCT GAC GAG AAA CCA ACG TAC ATC AAG CCA           | 42     |
| ACA ACA AGT GCA TCA TGG TCA TAG CGT AGA TTA TT                    | 35     |
| GTT AAC CGA GTG AAA TGG ATT ATT GAT TCA CCA GC                    | 35     |
| TGA AGA GGC TTT GAG GAT GCG GGA AAC ATC GAG AT                    | 35     |
| ACG TGC CCT AAT CGT CAC TCG GTC GCT GAG GCT TG                    | 35     |
| CTG AAC ACC TCA GAG GAC TTA GAA ATT TCG AAG CC                    | 35     |
| CTA AAC GAT TTT TTG TTT TCC CAA TCC AAA TAA TC                    | 35     |
| TTA GCG AAC CCG GGA GGC CAT CGA TAG CAG CGT AG                    | 35     |
| AAT GCC CCC TGT GAT AAA TTT TCA AAT ATA TTT AT                    | 35     |
| ATA AGC AGA TAA AAC ACT TTT GTC ACA ATC AGA CA                    | 35     |
| CAT TAT AAT GCT TGA TAA AGC ATG TCA ATC ATA TT                    | 35     |
| TCA TTG GAT TCG TAA AAT TAA CGT CAG ATG AAA AC                    | 35     |
| ACC GAT AGT GTG AAT TCA AAA GGC GAA TAA TAA TT                    | 35     |
| TTG TTC ATA TTC CTG ATT GAA CGT TTT CAC GTC AA                    | 35     |
| AAC TCA TCA GTC AGG TCG GGC CAG TGC CAA GCT TT                    | 35     |
| CGA TAG ACG CCA GAT ACA TAG GAA TAT GAA TTA GC                    | 35     |
| TTA AGG CAG AAG TAC CGA TCA ACA CCT GAA CAA GA                    | 35     |
| ACA ACT TTC AAC AGT TTC GTT TTG TCG TCT TTT GA                    | 35     |
| CCG GTG GCA TTT TCG GTC CAC TTT TGA TAA GAG GT                    | 35     |
| AAT TGA TGG CAT AAA GTG TCA CAT TGA TTT TAT TA                    | 35     |
| AAA ACA GAG GAG CAA ATG AAA AAT ACC TTG CTG AA                    | 35     |
| GCT CAA TTC GCG TCT GGC CCA GCT TTC ATC AAG AG                    | 35     |
| GAT TAT AAA CGT TAC TGT ATG GGC TTA TGC AAT TG                    | 35     |
| AAC AGG ATA AAA CCC TCA TAT ATT TGA TTC AAC TG                    | 35     |
| TTA TTA ATT GTA TTA AAT CCT TTA ACT AAT CAG AAT ATC AGT GCT TGA T | 49     |
| TAT CAA GGC GTT ACC GCA TTC CAA GAG TAA GTA TA                    | 35     |
| AAT TCC ACA GAA CAC TGA GTT TCG TTC AGG GAA AT                    | 35     |
| ATC AGC TCG AAT TCG TAA TGC CTG TGA GAT TTA AC                    | 35     |
| AAA AAA GGC TCT CTT AAA AGA TTA GTG AGG AAG GT                    | 35     |
| TGG GCC GTG CAT CTG CCA ACG ACG ACA GTA TCA GA                    | 35     |
| ATT TTT GAT TGT ACT GGT AAT AAG TTT TAA GCG TC                    | 35     |



|                                                                   |    |
|-------------------------------------------------------------------|----|
| ATA CAT GGC AAA GCC AAA GCC TGT TTA GTA GAC CGT GCC TAT           | 42 |
| CAG GCC GCT TTC TAC GGT CGC AGA AAA CAA AGC AA                    | 35 |
| TAA ATG GGA TAG GTC ACG ACG GCG GAT TGA CCC AA                    | 35 |
| GTA GCC AGT AAC GGG GTC                                           | 18 |
| AAT AAC TAA AAA CAT TAT TAC AAA CAA TTC GAA TA                    | 35 |
| TTT AAT ACA TTT CGC AAA TGA AAT AAA GGT GTC AA                    | 35 |
| ATT TTC GAG CCA GAA TGT CAT TAT AAT AAG AGC TA                    | 35 |
| TAT GTA GAA AAA AGG TGG TAC AAC GGA GAT TTG TA                    | 35 |
| CGG AGG TAA ATA AAT GCT TAT                                       | 21 |
| TCG CAC TCC AGA CCA GGC AAA GCG CTC AGG CTC CTC TTC CAG CTG GCC A | 49 |
| ACA CCG CCA CTT ATC ACT CAT CGA GAA CAA GCA AG                    | 35 |
| CGA CAG AAT CAA GTT TGC CTT TAG AGC GTT TGC CA                    | 35 |
| TCA CTT TGA CTA TAC CAA GCG CGA AGA CTT TTT CA                    | 35 |
| GCT GGA AAA CTT AAG GCG CTA GAA AAC GCT CAA AC                    | 35 |
| CCA GAG AGT ACA TAA ACG ATT GTT AAA CCA AGA CC                    | 35 |
| ATG ACG CTG AGC AAA CCC TCA ATC AAG TT                            | 29 |
| TAA ACA TCA ATG AGC AAT CGG GAG ATA TAC ACA AA                    | 35 |
| AGA AAT CAA GAC CGG AAA AGT AGC ATC ATT AAA TT                    | 35 |
| ATG TCG GGA AAG CTA ACT AAA GCC ACA TAC GTG TT                    | 35 |
| AGG CTA ACA ATC CAC CAC ACC CTC AGA ACC GCC AA                    | 35 |
| AAA ACC CAC AAA AAC AGG GAA GCG AAA ATG AAA TC                    | 35 |
| AAA GTA GTC AGA AGC AAA TAT TAT TTG GTT TGA TT                    | 35 |
| GCC GCC ACC CTA TAG CCC GAT ATA GCG GTA TTC TA                    | 35 |
| ACC AGA GCC GCA CCA CCG GAA CCG CCT CCC TCA GA                    | 35 |
| ACA GTG CTC ATA GGC TTG TTA TCT CTG AAA ACA TT                    | 35 |
| ATC ATC AAT TTG CTG TTT CCT GTG TGA AAT AGC CG                    | 35 |
| ACA GCA TAT TTG CGT TTT CAT CGT AGC TCA ACT GG                    | 35 |
| ACA GCC ATA TTA TTT AAA CGT CAC ATT AGA ATA TC                    | 35 |
| AAT AGC TGA AAA GGT GGC ATC AAT TTA GTA GCA TT                    | 35 |
| AAC TTC GAG AGA GTA TAG AAC CGC CCC TCA TTT CA                    | 35 |
| GGG GCA AAA TCC CTT ATA AAT CAA AAT ACC TGA AAG GGA GTT           | 42 |
| AGG AGG CAG ATA AAT CCT CAT TAA AGC CAG ATT GA                    | 35 |
| ACG TGA ATA ACC AGA AGG AGC GGA TTT GAG TGG AA                    | 35 |
| GGA ACC GAA CTT GTT ACT TAG CCG GCG AGA TAG GG                    | 35 |
| GAA CCG GTG TCA TGT TTT GCT GAA TTT TGC GGG GAT                   | 36 |
| TAT CAC GCA TCC TAA AGG CAG CAG ACC ATT AAA AT                    | 35 |
| AGG GGC TGC AAT TGG GTA ACG CCA GGT TTA CCA AAA ACC AAA ATA GGG G | 49 |
| GAA AGA GCA AGA AAC AAT GAA ATA AAA AGT AAC GG                    | 35 |
| AGA AAC ATG ACG TCC AAC CTA GGT CGG CTG CTT CT                    | 35 |
| TAA TTT AAT GGA AAC AGT GCT TCT TAG GTG TGC GG                    | 35 |
| CGA GTA ACA ACC TCC GTG GGA ACA ATT GGT GTA GA                    | 35 |
| ATA GTT TTT ATT TTC ATA TTA CCG CGC CCA ACG TT                    | 35 |
| AGT AAA ATA CAC TAA CGC CTC ACT TGC GCC ATC AG                    | 35 |
| AAT ACA TTT TGA CGC TCA ATC GTC GAA ACG CAA TA                    | 35 |
| ACC CGT CAC CAA TGA AAT TTT GAA GTC TTT CCA GAG CCG TTA           | 42 |
| GAA AAA CCG TCA GAT AGA ACC CTT CGC GTA AGA AT                    | 35 |
| CTC TGG GTT ATT AGT TAA AAT ACC TCA TAT GAT TC                    | 35 |
| TCA TAT TAA GCA AAC ATA TAC ATT AAC GTG GAC TC                    | 35 |

|                                                                   |    |
|-------------------------------------------------------------------|----|
| AAC GAA TTC TGT AAT GCA CCC ATC CTA ATT TAG AA                    | 35 |
| TCA TCT TCT GAC CAG GGG GTT TGT AAA TTT AAC TG                    | 35 |
| GGG TCT TTA ATT GCT CGA GAT TGG CAA TAT AAG GC                    | 35 |
| GGT GCC GGA ACC AGC TTT CCG GCA TAC TGC GAA TG                    | 35 |
| TAA CAA CAA AGC TGA AGG GTG AGA AAT ATT CAT GC                    | 35 |
| AAT AAT AAA CAA GAA GGA                                           | 18 |
| GCT TTC ACT ACT ACA AAA CTA ATG CCT CAG AGT TT                    | 35 |
| CAA CGT CAA AGA CAA ACG TTA GCC TAC CCA AAA GA                    | 35 |
| TCT TTT CAT AAT CAA AAC AGA GCC CAC CAG AGA G                     | 34 |
| CGG TGT ACA GAA GTA ATC TTG ACA ATT CAT TAC CC                    | 35 |
| GAG AAC GCC ATC AAA AAT ATT TTT TAA CCA ATA AC                    | 35 |
| AAG CGC TTC TGA TAT TCA ATT GCA TGT TAC AAC GT                    | 35 |
| ATT GGG GAG GGT TGA CGG AAA TTA TCC ATT ACC AA                    | 35 |
| CCA GAA CGC CTG TAG CAT AAC GGA TTC GCC TGT TC                    | 35 |
| CCT AAG GAA TAG CCG TCA CAA CTC TTA AAA GAT TA                    | 35 |
| TTC GGA ACC GCA GGA GGA TAC GGC AAA CAA GTC AG                    | 35 |
| CTT GTC GCT ATA CCT TTT TAC ATT GAA TTA TTC AT                    | 35 |
| GGT AGT GCG GGG CGC AAC TGT TGG GAA AAT CCC TT                    | 35 |
| AAA TAC CAG AAT TCA ACT AGA ACT GAA ATC TAA CG                    | 35 |
| TCT GTA AAA CTT CAG AAA TAT TTA ATT AAT ATT CA                    | 35 |
| TTG ATT AAA GAA AGC CTC CAC TCC TTA TTA CGC AG                    | 35 |
| ACT GGC ATG ATT AAG ATT ATG ACC CAA CGC AAT CC                    | 35 |
| CAA CAA GTT TAT CGA AAC TAA AAA TTG GAA ATG GC                    | 35 |
| CCG CCG CCA GCA ATG GAA AGC G                                     | 22 |
| TGT GCG ATC GAT AGT AAG AAT CGT TTA AAC AGT TC                    | 35 |
| TAA GGG CGA CAT TTG AAT TTA ATT AAT ATA TAG GT                    | 35 |
| GAT TTT CGA GTG CGC CGG ATA TAT CCT CAG CCG GC                    | 35 |
| GCT GAC CTT ACA AAG CCT GAT TGT TTT CAC CAG TG                    | 35 |
| CCG GTT TAG TGC CCA ATG TAC CGT ACA GCC CCG TA                    | 35 |
| TTT AGA CTG GAT TTT CCT TGA AAA CAT AGC GTA AC                    | 35 |
| TGA GAA GTA TTA AGA GGC TGA GAC TCC TCA AGG TT                    | 35 |
| TTG CTT AGT AAA CCA CAT TGA ATA CAA TCG CGC AG                    | 35 |
| CAG GAG GTT GTA AAG TCC AAC ATG TAA TTT CCA GT                    | 35 |
| TTC AAT TAC CGA AAA CAA TAG CAA ACC GCC ACC CTC AGC CC            | 41 |
| GGC GCA TAG GCG ATG CCC TGG TTA CGA ACC ACG CA                    | 35 |
| AAA ACG AGA ATA CTA TTA ATT AAG AAA TTC GAG AA                    | 35 |
| TTG AGC CTT TAA TTG TAA GCT TGC AAT ACA TAA AT                    | 35 |
| GGA AGT AAA TCA GAT TAA GAC GCT GAG GTC TGA AT                    | 35 |
| ATT CAC CGT TCA TTA ATG CCG GAG AAT CAG GTG AG                    | 35 |
| GAA ATG ACC AGA ATA GCC AAC GAG GCA ATC ATA AG                    | 35 |
| CCA GAC CAA CTT TGA AAG AA                                        | 20 |
| CAA AGC CTT TTA ACA TAA GAA TTG AAT AAT ACA AA                    | 35 |
| CAT AGC AAA GAT TTT AAG GCA ATA GCT ATC TTG TA                    | 35 |
| ATA GGC ACA GCC AAC AGT ATC AAG AGG AAA AAC GC                    | 35 |
| ACG CGC GGG GTT TTT CCC CTT CAT CCA CGC CAG CA                    | 35 |
| TAC GGA AGT TAC GCG ATC CCC AGA ATA CAC TAG CC                    | 35 |
| CAC CTT ATT CGT CAG ACT GTA GCA GCA AGG TTA GTT GAT CTT ACC AAC G | 49 |
| CTC AAA TAG CTA CTC CAC GGA ATC GAT TGA AGC GCT ACG GGA GAA TTA A | 49 |

|                                                |    |
|------------------------------------------------|----|
| GGC TTG AGG ATT AGA CTT CAT                    | 21 |
| TAA TGA GTG ACC TGT CGT                        | 18 |
| CTT GAG ATG GTT TAA TCG AGT AG                 | 23 |
| GAG ATC TAC AAA GGC TGG GTA GCC AAT ATG AGG C  | 34 |
| GAG TTG CAG CAA GCG GCC GCC TGG CCC TGA GA     | 32 |
| TTA AAT TTT TGT TAA ATT TGT TAA AAT TCG CA     | 32 |
| AAT CAC CAT TAT TTT TGA                        | 18 |
| AGG ACG TTG GGA AGA AGC TCA TTA TAC CAG TC     | 32 |
| TCG GTT GTA CCA AAA AAG A                      | 19 |
| GTA ATG TGT AGA CAG TCA                        | 18 |
| ATT GGG CGC CAG GGT GGA GAG GCA TTA            | 27 |
| TCA AAT ATC GCG TTT TGG AAG CCC GAA AGA CT     | 32 |
| AGC TTA ATT AAA TAT GCA                        | 18 |
| GTC AAA ACG ACA CTC TAG GGT ACC GCG CTC ACA A  | 34 |
| TCA GGT CTT TAC CCT GGA CCA TAA ATC AAA AA     | 32 |
| CGA AAT CAT AAA AGA ATA AAG CTA AA             | 26 |
| TTC TGT AAT ACT TTT GCG G                      | 19 |
| TGG TGG TTC CGA AAT CCG AAA ATC CTG TTT GA     | 32 |
| TGC CAG ACG AGA GGC TAT CAT ATT A              | 25 |
| AGA TTG TAT AAG CAA AAG CCC CAA AAA CAG GA     | 32 |
| CGA AAA GAT TAA CGG AAC AAC ATT AT             | 26 |
| AGA CCA TTA GGC TAT ATG GCG                    | 21 |
| AGA GCA ACA CTT TTG CAA                        | 18 |
| GAG AAG CCT AAT GCC TGA                        | 18 |
| ATC CCC CTC AAA TGC TCA TAA ATA TTC ATT GA     | 32 |
| TAG ACC GGA AGC AAA CTC C                      | 19 |
| GAA CAA GAG TCC ACT AGT GTT GTT CCA GTT TG     | 32 |
| CGA TGA ACG GTA ATC GGA GCA AAC AAG AGA AT     | 32 |
| GCC AGC TGC GGT TTG CGT                        | 18 |
| TTC CAC ACA TGG GGT GCC                        | 18 |
| CAA AAG AAG GCA CCA ACC TAA AA                 | 23 |
| AAG ACA AAG AAC GCG AAT GCA AAG TAC CAG ATC A  | 34 |
| AAT ACG TAA TGC CAC TTC CAT TAA TTC TGG ACA AT | 35 |
| AAC CCA TTG TCA CAC GAA AGG GAC AAC GGG TAA    | 33 |
| GGA ACG AGG GTA GCA AAG CGA AAT GCG CGA GTC A  | 34 |
| CCT TTT ACA AAG AAG ATG                        | 18 |
| ATT TTT GAA TCT TTA AGA CAG CAT C              | 25 |
| TGT GAG TGA TCA ATA GTG                        | 18 |
| TCG CCC ACG CAT AAC CAC A                      | 19 |
| GTA TTA ACA CAG TGC CAC AAC AAC CA             | 26 |
| AAA CAA CAT GTT CAG CTC CAG ACG ACG ACA AT     | 32 |
| AAT TTA TCA AAA TCA TAG AAG AGA TAA CCT TAC A  | 34 |
| CAT TTG GGA ATT AGA GCG TCA CCG ACT TGA GC     | 32 |
| ATG AAA CAA ATC AAT ATA                        | 18 |
| AGT GCC TTG CCC GTA GAA TAA AC                 | 23 |
| TTT GAA ACC ATG GAA GGA CCA TAT GTA ACA GTA    | 33 |
| ACC GGA ATC ATA ATT ATT A                      | 19 |
| CAG TAC CGT TGG CTT AAT T                      | 19 |

|                                                                   |    |
|-------------------------------------------------------------------|----|
| GAG AAT CGC CAT ATT TAC A                                         | 19 |
| GTT TAC CAG CGC CAA AAT AGA AAA TTC ATA TG                        | 32 |
| TTA GGA TTT GCT CAT CCA ATC GC                                    | 23 |
| CAC CAA CCA CTT TTT TTT TGA TTG TGA TTG TGA TTG T                 | 37 |
| GTT AGT CAT ATT TTT TTT TGA TTG TGA TTG TGA TTG T                 | 37 |
| TGT TAG TGT TAG TGT TAG TTT TTT TTT CGA AAG AGG                   | 36 |
| AAT CAA CCG TTT TTT TTT TGA TTG TGA TTG TGA TTG T                 | 37 |
| AGG AGT ACT CTT TTT TTT TGA TTG TGA TTG TGA TTG T                 | 37 |
| TGT TAG TGT TAG TGT TAG TTT TTT TTT TTA TCT CGG T                 | 37 |
| CCC TAA CCC TAA CCC TAA CCC TTT TTT TTT ACT AAA GTA GAG T         | 43 |
| TAA ATT GGG TTT TTT TTT CCC AAT CCC AAT CCC AAT CCC               | 39 |
| CCC TAA CCC TAA CCC TAA CCC TTT TTT TTT AAG AAG TTT               | 39 |
| AAG GCC AGG CTT TTT TTT TCC CAA TCC CAA TCC CAA TCC C             | 40 |
| CCC TAA CCC TAA CCC TAA CCC TTT TTT TTT TAC AGG TAG GGC ATA GTA   | 48 |
| CCC TAA CCC TAA CCC TAA CCC TTT TTT TTT AAC AGG TCA ATG GCT TAG   | 48 |
| TTA AAG ATA AAC CCT AAA AGA ACC CAG TCA CAG AT                    | 35 |
| ATT TAG CAA ATA AAC GGC GTA GAT GAG GGT TGT GG                    | 35 |
| AGA AGA ATT AGA AAA CTG AAA TAC TTT TAC ACA GA                    | 35 |
| CAG GCG TAA CCA ACT CCG TGG GAA CAT TTA AAG AT                    | 35 |
| ATC TTA TAC CAG ATT TAA AAG GTG TGT TTA TCA AC                    | 35 |
| TTA GCG TTT GCA AGC CTT AAG GCT TTC AGC TAA AT                    | 35 |
| TTT TTC ATT TTT TTA AAT GAA AAT TTT TAG ATT AA                    | 35 |
| TTA ATT TGC CAT CGA TAT GGG AAG GAT TAT ACC AA                    | 35 |
| TGT ATC GGT TTC GTC TTC GCA AAG ACA CCG GAA AT                    | 35 |
| TGC TCG GGA CGA CGA CAA AAC TAG AAA AGC CCA TA                    | 35 |
| TGA AAG TTT GAG CAT CAA ATC AAC AGT TGA AGA TT                    | 35 |
| TGG TGA ACA AAG AGG CAA AGA ATT AGC AAA AAC AT                    | 35 |
| ATT AGA GGC ATT TTC AAT ACC AGT TAC TAG ACA AT                    | 35 |
| AAG CAG AAC CTC AGA TGA TGA ACG CGC GGG GAC TT                    | 35 |
| AGT GAG GCG GAT GTG CTG CAA GAT ACC ATA TAA AT                    | 35 |
| CCA GAA AAA TAT GCA GAT CGA GCC AGT AAT ATT CC                    | 35 |
| TGG TAA TAA CCA TCA CTT GCC TGA GTA GAA GAA CT                    | 35 |
| CGC GAG CTG AGT TTG ACT TCC ATA AAG AAT ATA AT                    | 35 |
| GGT TTC AAT CAA CCA GAC CGG AAA AAG AGA GAA AG                    | 35 |
| TCA ATT GTT ATG GTC ATA GCT GTT TTG CCC GAA CG                    | 35 |
| GGC GGG GTT TAG GGT TGC TCA GAA AGG GAT ACT GA                    | 35 |
| TAA TCG TAA GAG TGG TTC CGA AAA GAT TCA CCT TCT GAC TTC AGG TAA G | 49 |
| ATT CAT TGA ATC CCC GTA AAG AAA TCC AGA CTA AC                    | 35 |
| TTA ACC GGA AAA TAA GAC GAG CGT AGT AGC GTT TC                    | 35 |
| AGA GCC GTC TGT GTG AAG TTG GCA CCT TGC TAA TG                    | 35 |
| GCG CTT TTA TTC TTT CCT TAT CAT TAT TTA CGA AT                    | 35 |
| ACA CCA ACG TAG TCC ACT ATT AAA CCG AGA TGG CG                    | 35 |
| CAT AAG ATC GAA TCG ATC AAA GGC AGC TTA ATT GC                    | 35 |
| AAA TCG TCA TGT AAT AGA TGA CAA CAA CCT GTA TC                    | 35 |
| GGG ACG CCA GTT TCC CAT CAA AAG TCA TAT AGG GG                    | 35 |
| TCA CAG AGC CAT CAG ATC ATC GAG CGG GTA TTA AA                    | 35 |
| AAA TTA TTC ATT AAC ATA CAA TCC ATC ATA ATA TA                    | 35 |
| GGT GAT TAG CTG AGA CTC CTC AAG GTT AAT GAC CC                    | 35 |

|                                                |    |
|------------------------------------------------|----|
| GAA CGG AAT AGC CAC CCA AAC AGC ATC GGA ACG AG | 35 |
| AAT GCA AAA TGA ATT ATT GAG GGA TAT GGT TCT AA | 35 |
| GCA CGA GAA ACA AAT AAC ATC CCC AGA ACG AGT AG | 35 |
| CTA TTT ATC CAA GCA AAC TCC AAC AGC AAC ATA GC | 35 |
| GCT ATC AGT TAT AAA ACC ACT CAT GTA TCA TCG CC | 35 |
| ACG CTG AGA AGG CCC TTT AAA TAG CAA TAG CTA TA | 35 |
| ACA ACT TTA ATT TCT GTA GAC AGC CCT CAT ACA TG | 35 |
| AGG TCA CCA GTC GCC ACC ATA TAA GTA TAG CCG GA | 35 |
| TAC TAA ATA TTG ACG ATT CAC AAT ACA TAT AAG AA | 35 |
| ACT ACC CGT CGG ATT AAA ATT CGC GTC TGG CCA GC | 35 |
| CTA CGA AGG CAC TAA AAG AAC TAA GCG ATT TTA CA | 35 |
| ATC CAA ATC CTT CCA ATA GAT AAT ACA TTT GAC GA | 35 |
| TAT GAT TAG AGA GCT TCT GAA AGC GGA TTG CTG CC | 35 |
| AAG AAT GAA TGG TGG CAC AAT AGA TAA TAT CCA GG | 35 |
| GAG CTA TGT AAA TAT ATT GCG CAT TGA GAG AAT AA | 35 |
| CTT CTG ACC TAA CGG ATG TAG ATT CTG AAA GGC GC | 35 |
| GAT CTA AAG TTC ACC CTC TCG TTT TAG TAA GAG GT | 35 |
| AAA ATA CCA CAA GAT TCG TAG CTC GTC TGG ACT AG | 35 |
| TCA AAA CGT TAT AGT CAG AAG CAG AAA CAG TTC AG | 35 |
| CGC AAA TTC AGG GAA GGC GTA ACA GCA AGC CCA AT | 35 |
| GTT ATT CCA CAT GGG ATC CAA AAA AAA GGC TCC AA | 35 |
| AAG TAG TAC CGG TGT ATC ACC GTA CCC CAG CAA AA | 35 |
| ACG GTA ACA GAG AGC CAC CAC CAT TGG CTC ATA CG | 35 |
| GTT TTT TTC AAA TGC TGA CCG AGG ATT AAG AAA AG | 35 |
| TTT AAC TAA CAA CTA ATA AGG AAT TAA TGA AAG TA | 35 |
| GTG CCT AAT GCA CAC AAG CCT TTA TTA ATT CGT AA | 35 |
| ATT AAA TTC TAT CAC CAT GAT TCC CAA TTA TGA GC | 35 |
| ACT AAA AAG AAC TGA TTG GCT CGG CAA AAT CCC AG | 35 |
| AAT TGG CTT AGT ATC AGG CTA TTT TTG CGC AAC GC | 35 |
| GTA GCC TCT TCT GTT GGT GCC GGA GCC AGC TCG TT | 35 |
| AGC TTG CTT TCG AGG TGG CCG ACA TAA AAT GGA AG | 35 |
| GTT TTT TAA CCT CCG GCC ATC AAG GTG CAT CAT CA | 35 |
| CTC CCT ATT AAT TTT AAT TGC GAT TAA GTT GGA GA | 35 |
| GTA AAA TAC CAA GCA ACG GGG ATC GTT ATC GCC CA | 35 |
| TTA GAA CCA ATG AAA CCA GTT ACA TAA CAG TTC AA | 35 |
| CAG TAT CCT CAT TAA AGC CCA CCA CGA ACC GCA CA | 35 |
| ACA GGA AAA ATA CAT TGC TTT GAA AAA CAA TAA AT | 35 |
| CGC ATA ACC GAA AGG CCG AAA ACC AGC CAA AAT TT | 35 |
| CCA TAT AAA CTA TCG GCC AAT TAC AAA ACA AAT TA | 35 |
| GAC GGA CGG AAT AAG TTC AAG AAT AAA GCG ATA TG | 35 |
| AAT CGG CCA GGC GGT CAA ATC TAA AGT AAC ATC GT | 35 |
| AGC ATT AGC AAA CCT CAA ATG CTT TTT AAG CCG AG | 35 |
| TAA CTC TGA ATT TAC CGT ACA GGA CCT ATT TAA GA | 35 |
| AAA GCA TTG ACC CTC AGT CAT AAT TCG GCA TAC AG | 35 |
| TGA GTT ACT TTT TCA ACA AAA ATT GGG CTT GGT AA | 35 |
| GAA CTG ATA GAC AGA GGT GGC AAT CAT CAT AAG AG | 35 |
| TAT TTG GTT TTT TTC CAG TCG GGA AAG CTA ACC AG | 35 |
| TTT ATC AAA ATC GCG TTA GAA AAG ACA AGA GCA CT | 35 |

|                                                |    |
|------------------------------------------------|----|
| ACA AGT GAA TTT GCC ATC AAA AAT CAA AAT TTT GC | 35 |
| TTA GCA TAG CCC CCT TGT GCA GCA CTT ACC ATC TG | 35 |
| TAG ATT CTA ATG CGG GAA TTT TGC ACG CTA AAA CG | 35 |
| CAG ACG CGC CGC ATC AAA GTA GTA ACC AGA ACA TG | 35 |
| GTT AGT TTC ACA TTA GAT AAG AAC GGT TTA AAG CC | 35 |
| AAA AGT TTT AAT AAA CAA GCG CGA AAC AAA GTA CA | 35 |
| GCA AAG GGG GTT TGC GTG TGC CAG CTG CAT TGA AC | 35 |
| AAG AAC TGC GAA CGA GTA GTC AGG CAC CCT CTG CC | 35 |
| CTG TAA AGA TGT CAC GAA TGC CTG TCA CAT TTG GG | 35 |
| TGA CAA TAA TTA ACC CAT ATT TTG CAT AAC CCA GC | 35 |
| ACG TTC GGG AGT ACC AAG TCA ATT ATC CCT TAA AG | 35 |
| TTT GCC CCA GCC GCC TGG CAA AGC GCC ATT TAC CT | 35 |
| AAA CAT AAA GTC ATG TAA CAA CAG TAA TAA ACA TG | 35 |
| AGA TAA GTC CGT ACC GAG CTC GTC ACT CTA GCC AG | 35 |
| TCT ACG GTG TAC AGA CCT TGC GCA GAC GGT CAA TC | 35 |
| AAT ACA TAC ACA GTA TGA GAA ACA ATG AAC GTG AG | 35 |
| GGT GGA GGT TGC CGG AAA CGT CGA CGA GGC AAC CA | 35 |
| CAA CTT ATC ATG AAT TAT TCA TCA AAT AAT GGT TA | 35 |
| TAT AAG GCC GGG TAA CGA GGA TCC AAA TAT CAA AC | 35 |
| CTT TAG CCG CCC CCC CTG GTG TAC TGG TAA TAG CG | 35 |
| AAT CTT AAT TCG AGT ACC GGA ATT ATT TAG GAC GG | 35 |
| GAA TTA GTT AAT TTC TGG GGT TAT ATT CAT AGG TC | 35 |
| CGC CTT ATA ATG CCA GTT TGA GGC GAT GAT GTT TA | 35 |
| CGT ACG GGG TCA GTG CCA GGC GCA TAG GCG AAT GG | 35 |
| AGC GAA AGC CGT TAG CGG TTA GTA GAG CCT TTA AT | 35 |
| CCT TAT TAC GTA CAA CAG TTT CAG CGG AGT GTG AT | 35 |
| CGG AAA CAG TAC ATA AAA TTT ACC TTT TTT ATG CA | 35 |
| GGA ACG AGG AGA GAT TTC TTT GAC CTG TAA TGC CA | 35 |
| GCT GAC CTT CAT CAA GAA GCT CAG AGC CGC CGC AT | 35 |
| AAA AAT CCT GTT TGA TGA TAC GTG AAT AAA GCA AA | 35 |
| AGG TCA GAA CAG CAC CAC GTA ATC CTT TCC ACA AG | 35 |
| AAC TTA CCG AAA GTC AAT ATT TCA TTT GAA TTC CT | 35 |
| TAA AAC GGA AAA GGA AAT GCA AAT ATT CAT TTT AC | 35 |
| AAT AAC ATG TAT CCG GTC AAG CAA GCC GCC ACA AA | 35 |
| ATT CAT CCT ACC AAG AAA ACA AGC AAG CCG TCC AA | 35 |
| AAC AGG CGA AGA ATA GCG ATC CAG AAC AAT ATT AC | 35 |
| TTT CTT ACC AAC CCA GCA CGC CAA ACC GAC AAG GA | 35 |
| TTG AGA ATA CAC CAA CCA AGT TTC GAG GAC TGG AG | 35 |
| GAC TGA ACG CGC GAC GAC AGC ATG TAA CAA TTG GA | 35 |
| GGT TCA ACG CTT TTA GGC AGT TGC TGG TTT TGC AT | 35 |
| CAG AAA CAG CTG TTT AGT ATC ATA GAA CGG TCC CG | 35 |
| TCA TCC GCT CAC AAT TCA GCT CAA TCA ATA TCT GG | 35 |
| ACC GGT GAG AGA TAT TCT CTA TGC GTT ATA CAT TT | 35 |
| GGT CTG GCG ACG CGC CAT TCA GGC TGA GAG AAA CC | 35 |
| GTC TAG CAG CTT TTG TTA AAT AAG AGG GCT TCT TC | 35 |
| CTG ACC TGT CAT TGG GCT CTT TTT GAA TGG CTA TT | 35 |
| AAT GTA CGG TAA CAT GTT GCG GAT GCT CCT TTC AA | 35 |
| ACT ACC TTT GTT TTT TTA ACC AAT AGG AAC ATC AA | 35 |



|                                                |    |
|------------------------------------------------|----|
| TAA ATC ATA CAG GCA TAC CGC ACT ATC TAA TTT CT | 35 |
| TAC AAT CGT AGT ATC GGA AAC AGA GCA CAG ACA AT | 35 |
| AGA GAC GAT ACT TTT GCG CTA CAG AGG CTT TCA TT | 35 |
| CCA AAC CAG GCC CTG AGC AGC TGA TTG CCC TGC CA | 35 |
| ATT CTT TAC AAG ACG GGG GGT AAT CAA TAA TGA CT | 35 |

**Table 3.** 9-HG poly-T staple sequences.

| Sequences (5'-3')                                                      | #Bases |
|------------------------------------------------------------------------|--------|
| GGT GGA TTG AGT GAG CGT AGC CAG CTT TCA TCA TTT TTT TTT                | 42     |
| ATA AGA TTA ATT ACC CTT GAC CAT AAA TCA AAA TTT TTT TTT                | 42     |
| TTT TTT TTT CGA AAG ACT TTG ATA AGA TTT TTT TTT                        | 36     |
| TTT TTT TTT TGA GAC GGG CAA AGA GTT GCA GCA TTT TTT TTT                | 42     |
| TTT TTT TTT CGC TTC TGG GAA GGG CGA TTT TTT TTT                        | 36     |
| TTT TTT TTT CCT GTA ATA CTT TTG CCC AAA AAA GCT TGC CGT T              | 43     |
| TTT TTT TTT AGT CTG GAG CAA CCC CAA AAA CAG TTT TTT TTT                | 42     |
| TTT TTT TTT ATT ACA GGT AGA ATT CAA CTA ATG TTT TTT TTT                | 42     |
| ATA CAG ATG ATG ACA AGA ACC GGA TAT TCT TTT TTT TT                     | 38     |
| TTA TAT ATT CTA GTT GCA ATT TCT TAA ACA GCT TTT TTT TTT                | 42     |
| TTT TTT TTT AAC CGT CTA TCA TTG ATT AGT AAT AAG TGG                    | 39     |
| GTC GAA CGC AAG GAT ATA GGG AGA ACA TAC GAG CCG GAA GCA TAT TTT TTT TT | 53     |
| TTT TTT TTT GCT TTT GCA AAA TTT AGA CTG GAT TTT TTT TTT                | 42     |
| TTT TTT TTT ACA TTA AAT CCG TAA TGG TTT TTT TTT                        | 36     |
| TTT TTT TTT GAA TTA CCT TAT CGG AAC AAC ATT TTT TTT TTT                | 42     |
| TCG GCC CTG AAT AAA GCC TCA GAG CAT AAT TTT TTT TT                     | 38     |
| TTT TTT TTT CCA GTG CCA CAT TAT GAC TTT TTT TTT                        | 36     |
| TTT TTT TTT CAA CTT TGA AAG AGG AAG GGA ACG CTC CAT TAA A              | 43     |
| TTT TTT TTT CGG AGA GGG TAG TCA TTG CCT GAG TTT TTT TTT                | 42     |
| TTT TTT TTT AGC GGT CCA CGC AGT GTT GTT CCA TTT TTT TTT                | 42     |
| TTT TTT TTT CTC ACT GCC CGC TCT TTT CAC CAG TTT TTT TTT                | 42     |
| TTT TTT TTT TTC ATG AGG TAA AAC GAA TTT TTT TTT                        | 36     |
| TTT TTT TTT CCT GTT TAG GCT GCT CAT TTT TTT TTT                        | 36     |
| TTT TTT TTT CAG ATA CAT AAC AAA TAG CGA GAG TTT TTT TTT                | 42     |
| TTT TTT TTT TCA GTG AAT AAG GCT TTA ACA AAC TAT ATT CGC A              | 43     |
| TTT TTT TTT CCA TAT TTA ACA TAC AAT TTT TTT TTT TTT                    | 39     |
| TTT TTT TTT AAA TGA AAA ACC GAC TTG AGC TTT TTT TTT                    | 39     |
| GCG TTT GCG GAG CAG CAG AGG AAG GTT ATC TAA AAT TTT TTT TTT            | 45     |
| TTT TTT TTT ATC CTG AAT GCC TTT AGC GTC TTT TTT TTT                    | 39     |
| TTT TTT TTT CAC CAC CCT CAT TTT CCC GCC ACA GAG CCA CAA G              | 43     |
| TTT TTT TTT GAT AAG TGC CGT CGA GTG CTC AGG TTT TCA CAA AAT CCC C      | 49     |
| TTT TTT TTT ATA ATC GGC TGT TTC ATC GTA TTT TTT TTT                    | 39     |
| TTT TTT TTT ATC TTT AGG AGC GAA GTA TTA TTT TTT TTT                    | 39     |
| TTT TTT TTT CAA AGA ACG CGA ACT GAA CAC TTT TTT TTT                    | 39     |
| TTT TTT TTT CAA AGT TAC CAG TAC CCA AAA TTT TTT TTT                    | 39     |
| TTT TTT TTT TGG ATT ATA AAT TGA GAA TCG TTT TTT TTT                    | 39     |
| TGA CAG AGA TAC ATC GCC ATT AAA AAT ACT TTT TTT TT                     | 38     |
| TAA GTT AGA TTG AAT CCT GTC GCT AGG AAA TAC CTA CAT TTT GAT TTT TTT TT | 53     |
| TTT TTT TTT AGA CGA TTG GCC AAG CGT CAT TTT TTT TTT                    | 39     |
| TAT TCG CTC ATT TAA TTA TCA ATA TAT GTG AGT GAA TAA CCT TGT TTT TTT TT | 53     |

|                                                                   |    |
|-------------------------------------------------------------------|----|
| TTT TTT TTT CTA CAA CGC CTG TAG CTC GTC ACA ACC GAT CAC C         | 43 |
| TTT TTT TTT GAA ACA TGA AAG TAT TCG GAA CCA CCG CCT CAG GAG GAC C | 49 |
| TTT TTT TTT ACA TGG CTT TTG ATG ATT CCA GTT TGA TAT TCA C         | 43 |
| TTT TTT TTT CAT TTG GGA ATT CCT CAG AGC TTT TTT TTT               | 39 |
| TTT TTT TTT AAC AGT ACC CGA CCG TGT GAT TTT TTT TTT               | 39 |
| TTT TTT TTT AAC AAC TAA AGG AAT TGT GTA CCA GCA GTC               | 39 |
| TGA TAT AAT CCA GCA GAC ACC GCC TGC AAC AGT GCC TTT TTT TTT       | 45 |
| AAA TGA AAT GCG ACC AGT AAT AAA AGG GAT TTT TTT TT                | 38 |
| TTT TTT TTT CAT TCT GGC CAA ATA TAC AGT TTT TTT TTT               | 39 |
| TTT TTT TTT ATT CTG TCC AGA AGG CGT TTT TTT TTT TTT               | 39 |
| TTT TTT TTT TTC ACG TTG AAA ATC TTT CGA AT                        | 32 |
| TTT TTT TTT CCT GAA CAA GCC AAA GAC AAA                           | 30 |
| TTT TTT TTT AGC GAA CCT ACC GGA ACC AGA                           | 30 |
| AGG CGA ATT CCA ATC GCA AGA TTT TTT TTT                           | 30 |
| GCC ACC ACC GGA TAT TAT TCT TTT TTT TTT                           | 30 |
| TTT TTT TTT CTT CTG TAA ATC TGA AAA CAT                           | 30 |
| ACC ACC AGA AAA GGT AAA GTA TTT TTT TTT                           | 30 |
| TTT TTT TTT ACG CTG AGA GCC AAC AAA GAA                           | 30 |
| AAT AAT TTT TTT TTT TTT                                           | 18 |
| TTT TTT TTT GTA ATG TGT AGG ATA AAT TAA TGC                       | 33 |
| TTT TTT TTT CCG CGA CCT CGA ACT GAC                               | 27 |
| TTT TTT TTT TGA TAC CGA GGT CGC TGA                               | 27 |
| ATC AGG TCT GAG GAA GCC TTT TTT TTT                               | 27 |
| GTT TGG AAC AAG CAA AGG GCG AAA TTT TTT TTT                       | 33 |
| TTT TTT TTT GAA GAT TGT ATA TGT TAA AAT TCG                       | 33 |
| AAG TGT AAA GCC AAT TGC GTT GCG TTT TTT TTT                       | 33 |
| GCA ACT AAA GGT CAA TAA TTT TTT TTT                               | 27 |

**Table 4.** 9-HG docking strand sequences.

| Sequences (5'-3')                                                       | #Bases |
|-------------------------------------------------------------------------|--------|
| TTT TTT TTT CGA ACG AAC CAC CTG ATT GTT TTT TTT TTG TCG CAC AGC         | 48     |
| TTT TTT TTT CGC TCA ATC GTC ATC GCG CAG TTT TTT TTG TCG CAC AGC         | 48     |
| TTT TTT TTT AGC GAT AGC CAG ATA GCC GAA TTT TTT TTG TCG CAC AGC         | 48     |
| TTT TTT TTT GAC TTT ACA AGA AAC CAA TCA TTT TTT TTG TCG CAC AGC         | 48     |
| TTT TTT TTT GAA CTG GCA AGA ATA GAA AGG TTT TTT TTG TCG CAC AGC         | 48     |
| TTT TTT TTT GGA ATC ATT TTG AGG CAG GTC TTT TTT TTG TCG CAC AGC         | 48     |
| TTT TTT TTT AGA CTG TAG CGC TAC CAG GCG TTT TTT TTG TCG CAC AGC         | 48     |
| TTT TTT TTT AGG GCG ACA TTC CAG TAC AAA TTT TTT TTG TCG CAC AGC         | 48     |
| CGA CAC GCT GTT TTT TTT TCG GTG CGG AAA CGA CGG TTT TTT TTT             | 45     |
| CGA CAC GCT GTT TTT TTT GAT AGG TCA TTC CGG CAC TTT TTT TTT             | 45     |
| CGA CAC GCT GTT TTT TTT CAT TAA ATT TTT GTT AAA TCT TCC TGA GTA         | 48     |
| CGA CAC GCT GTT TTT TTT AGC TAA ATC GGT TGC AAT GCC TGA TTT TTT TTT     | 51     |
| CGA CAC GCT GTT TTT TTT AGC GTC CAA TAC TGC GGA AAC GAG AAG ACT ATT AAT | 54     |
| CGA CAC GCT GTT TTT TTT ATT ACC CAA ATC TTT AAT CAT TGT TTT TTT TTT     | 51     |
| CGA CAC GCT GTT TTT TTT AGA GGC AAA TGT CGA AAT TTT TTT TTT             | 45     |
| CGA CAC GCT GTT TTT TTT GGC TTG CAG AAA GAC TTT TTT TTT TTT             | 45     |
| TTC CGC GAC GTA AAT AAG GCG TTT AAC GTC AAT TTT TTT TGT CGC ACA GC      | 50     |
| CGA CAC GCT GTT TTT TTT GGT CAT TTT TTT AAA TAT TGC AGC GCC TT          | 47     |

**Table 5.** 18-HG poly-T staple sequences.

| Sequences (5'-3')                                                      | #Bases |
|------------------------------------------------------------------------|--------|
| GGT GGA TTG AGT GAG CGT AGC CAG CTT TCA TCA TTT TTT TTT                | 42     |
| ATA AGA TTA ATT ACC CTT GAC CAT AAA TCA AAA TTT TTT TTT                | 42     |
| TTT TTT TTT CGA AAG ACT TTG ATA AGA TTT TTT TTT                        | 36     |
| TTT TTT TTT CGC TTC TGG GAA GGG CGA TTT TTT TTT                        | 36     |
| TTT TTT TTT CCT GTA ATA CTT TTG CCC AAA AAA GCT TGC CGT T              | 43     |
| TTT TTT TTT AGT CTG GAG CAA CCC CAA AAA CAG TTT TTT TTT                | 42     |
| TTT TTT TTT ATT ACA GGT AGA ATT CAA CTA ATG TTT TTT TTT                | 42     |
| ATA CAG ATG ATG ACA AGA ACC GGA TAT TCT TTT TTT TT                     | 38     |
| TTA TAT ATT CTA GTT GCA ATT TCT TAA ACA GCT TTT TTT TTT                | 42     |
| GTC GAA CGC AAG GAT ATA GGG AGA ACA TAC GAG CCG GAA GCA TAT TTT TTT TT | 53     |
| TTT TTT TTT ACA TTA AAT CCG TAA TGG TTT TTT TTT                        | 36     |
| TCG GCC CTG AAT AAA GCC TCA GAG CAT AAT TTT TTT TT                     | 38     |
| TTT TTT TTT CCA GTG CCA CAT TAT GAC TTT TTT TTT                        | 36     |
| TTT TTT TTT CGG AGA GGG TAG TCA TTG CCT GAG TTT TTT TTT                | 42     |
| TTT TTT TTT AGC GGT CCA CGC AGT GTT GTT CCA TTT TTT TTT                | 42     |
| TTT TTT TTT CTC ACT GCC CGC TCT TTT CAC CAG TTT TTT TTT                | 42     |
| TTT TTT TTT CCT GTT TAG GCT GCT CAT TTT TTT TTT                        | 36     |
| TTT TTT TTT CAG ATA CAT AAC AAA TAG CGA GAG TTT TTT TTT                | 42     |
| TTT TTT TTT TCA GTG AAT AAG GCT TTA ACA AAC TAT ATT CGC A              | 43     |
| TTT TTT TTT CCA TAT TTA ACA TAC AAT TTT TTT TTT TTT                    | 39     |
| TTT TTT TTT AAA TGA AAA ACC GAC TTG AGC TTT TTT TTT                    | 39     |
| TTT TTT TTT ATC CTG AAT GCC TTT AGC GTC TTT TTT TTT                    | 39     |
| TTT TTT TTT CAC CAC CCT CAT TTT CCC GCC ACA GAG CCA CAA G              | 43     |
| TTT TTT TTT GAT AAG TGC CGT CGA GTG CTC AGG TTT TCA CAA AAT CCC C      | 49     |
| TTT TTT TTT ATA ATC GGC TGT TTC ATC GTA TTT TTT TTT                    | 39     |
| TTT TTT TTT ATC TTT AGG AGC GAA GTA TTA TTT TTT TTT                    | 39     |
| TTT TTT TTT CAA AGA ACG CGA ACT GAA CAC TTT TTT TTT                    | 39     |
| TTT TTT TTT CAA AGT TAC CAG TAC CCA AAA TTT TTT TTT                    | 39     |
| TTT TTT TTT TGG ATT ATA AAT TGA GAA TCG TTT TTT TTT                    | 39     |
| TAA GTT AGA TTG AAT CCT GTC GCT AGG AAA TAC CTA CAT TTT GAT TTT TTT TT | 53     |
| TTT TTT TTT CTA CAA CGC CTG TAG CTC GTC ACA ACC GAT CAC C              | 43     |
| TTT TTT TTT GAA ACA TGA AAG TAT TCG GAA CCA CCG CCT CAG GAG GAC C      | 49     |
| TTT TTT TTT ACA TGG CTT TTG ATG ATT CCA GTT TGA TAT TCA C              | 43     |
| TTT TTT TTT AAC AGT ACC CGA CCG TGT GAT TTT TTT TTT                    | 39     |
| TTT TTT TTT AAC AAC TAA AGG AAT TGT GTA CCA GCA GTC                    | 39     |
| TGA TAT AAT CCA GCA GAC ACC GCC TGC AAC AGT GCC TTT TTT TTT            | 45     |
| AAA TGA AAT GCG ACC AGT AAT AAA AGG GAT TTT TTT TT                     | 38     |
| TTT TTT TTT CAT TCT GGC CAA ATA TAC AGT TTT TTT TTT                    | 39     |
| TTT TTT TTT ATT CTG TCC AGA AGG CGT TTT TTT TTT TTT                    | 39     |
| TTT TTT TTT TTC ACG TTG AAA ATC TTT CGA AT                             | 32     |
| GCC ACC ACC GGA TAT TAT TCT TTT TTT TTT                                | 30     |
| TTT TTT TTT CTT CTG TAA ATC TGA AAA CAT                                | 30     |
| TTT TTT TTT ACG CTG AGA GCC AAC AAA GAA                                | 30     |
| AAT AAT TTT TTT TTT TTT                                                | 18     |
| TTT TTT TTT CCG CGA CCT CGA ACT GAC                                    | 27     |

|                                             |    |
|---------------------------------------------|----|
| TTT TTT TTT TGA TAC CGA GGT CGC TGA         | 27 |
| ATC AGG TCT GAG GAA GCC TTT TTT TTT         | 27 |
| GTT TGG AAC AAG CAA AGG GCG AAA TTT TTT TTT | 33 |
| GCA ACT AAA GGT CAA TAA TTT TTT TTT         | 27 |

**Table 6.** 18-HG docking strand sequences.

| Sequences (5'-3')                                                                  | #Bases |
|------------------------------------------------------------------------------------|--------|
| TGA CAG AGA TAC ATC GCC ATT AAA AAT ACT TTT TTT TGT CGC ACA GC                     | 47     |
| GCG TTT GCG GAG CAG CAG AGG AAG GTT ATC TAA AAT TTT TTT TTG TCG CAC AGC            | 54     |
| TTT TTT TTT CGA ACG AAC CAC CTG ATT GTT TTT TTT TTG TCG CAC AGC                    | 48     |
| TTT TTT TTT CGC TCA ATC GTC ATC GCG CAG TTT TTT TTG TCG CAC AGC                    | 48     |
| TTT TTT TTT AGC GAT AGC CAG ATA GCC GAA TTT TTT TTG TCG CAC AGC                    | 48     |
| TTT TTT TTT GAC TTT ACA AGA AAC CAA TCA TTT TTT TTG TCG CAC AGC                    | 48     |
| TTT TTT TTT GAA CTG GCA AGA ATA GAA AGG TTT TTT TTG TCG CAC AGC                    | 48     |
| TTT TTT TTT GGA ATC ATT TTG AGG CAG GTC TTT TTT TTG TCG CAC AGC                    | 48     |
| TTT TTT TTT AGA CGA TTG GCC AAG CGT CAT TTT TTT TTG TCG CAC AGC                    | 48     |
| TTT TTT TTT AGA CTG TAG CGC TAC CAG GCG TTT TTT TTG TCG CAC AGC                    | 48     |
| TTT TTT TTT AGG GCG ACA TTC CAG TAC AAA TTT TTT TTG TCG CAC AGC                    | 48     |
| CGA CAC GCT GTT TTT TTT TGA GAC GGG CAA AGA GTT GCA GCA TTT TTT TTT                | 51     |
| CGA CAC GCT GTT TTT TTT AAG TGT AAA GCC AAT TGC GTT GCG TTT TTT TTT                | 51     |
| CGA CAC GCT GTT TTT TTT TCG GTG CGG AAA CGA CGG TTT TTT TTT                        | 45     |
| CGA CAC GCT GTT TTT TTT GAT AGG TCA TTC CGG CAC TTT TTT TTT                        | 45     |
| CGA CAC GCT GTT TTT TTT CAT TAA ATT TTT GTT AAA TCT TCC TGA GTA                    | 48     |
| CGA CAC GCT GTT TTT TTT AGC TAA ATC GGT TGC AAT GCC TGA TTT TTT TTT                | 51     |
| CGA CAC GCT GTT TTT TTT AGC GTC CAA TAC TGC GGA AAC GAG AAG ACT ATT AAT            | 54     |
| CGA CAC GCT GTT TTT TTT ATT ACC CAA ATC TTT AAT CAT TGT TTT TTT TTT                | 51     |
| CGA CAC GCT GTT TTT TTT CAA CTT TGA AAG AGG AAG GGA ACG CTC CAT TAA A              | 52     |
| CGA CAC GCT GTT TTT TTT AGA GGC AAA TGT CGA AAT TTT TTT TTT                        | 45     |
| CGA CAC GCT GTT TTT TTT GGC TTG CAG AAA GAC TTT TTT TTT TTT                        | 45     |
| TTT TTT TTT AGG CGA ATT CCA ATC GCA AGA TTT TTT TTG TCG CAC AGC                    | 48     |
| TTT TTT TTT ACC ACC AGA AAA GGT AAA GTA TTT TTT TTG TCG CAC AGC                    | 48     |
| TTT TTT TTT CAT TTG GGA ATT CCT CAG AGC TTT TTT TTG TCG CAC AGC                    | 48     |
| TTC CGC GAC GTA AAT AAG GCG TTT AAC GTC AAT TTT TTT TGT CGC ACA GC                 | 50     |
| TTC CGC GAC GTC CTG AAC AAG CCA AAG ACA AAT TTT TTT TGT CGC ACA GC                 | 50     |
| TTC CGC GAC GTA GCG AAC CTA CCG GAA CCA GAT TTT TTT TGT CGC ACA GC                 | 50     |
| CGA CAC GCT GTT TTT TTT GAA GAT TGT ATA TGT TAA AAT TCG TTT TTT TTT                | 51     |
| CGA CAC GCT GTT TTT TTT GTA ATG TGT AGG ATA AAT TAA TGC TTT TTT TTT                | 51     |
| CGA CAC GCT GTT TTT TTT CCG CGA CCT CGA ACT GAC TTT TTT TTT                        | 45     |
| CGA CAC GCT GTT TTT TTT GGT CAT TTT TTT AAA TAT TGC AGC GCC TT                     | 47     |
| CGA CAC GCT GTT TTT TTT GCT TTT GCA AAA TTT AGA CTG GAT TGC AGC GCC TT             | 53     |
| CGA CAC GCT GTT TTT TTT GAA TTA CCT TAT CGG AAC AAC ATT TGC AGC GCC TT             | 53     |
| TAT TCG CTC ATT TAA TTA TCA ATA TAT GTG AGT GAA TAA CCT TGT TTT TTT TGT CGC ACA GC | 62     |
| CGA CAC GCT GTT TTT TTT AAC CGT CTA TCA TTG ATT AGT AAT AAG TGG                    | 48     |

**Table 7.** 27-HG poly-T staple sequences.

| Sequences (5'-3')                                       | #Bases |
|---------------------------------------------------------|--------|
| GGT GGA TTG AGT GAG CGT AGC CAG CTT TCA TCA TTT TTT TTT | 42     |

|                                                                        |    |
|------------------------------------------------------------------------|----|
| ATA AGA TTA ATT ACC CTT GAC CAT AAA TCA AAA TTT TTT TTT                | 42 |
| TTT TTT TTT CGA AAG ACT TTG ATA AGA TTT TTT TTT                        | 36 |
| TTT TTT TTT CGC TTC TGG GAA GGG CGA TTT TTT TTT                        | 36 |
| ATA CAG ATG ATG ACA AGA ACC GGA TAT TCT TTT TTT TT                     | 38 |
| TTA TAT ATT CTA GTT GCA ATT TCT TAA ACA GCT TTT TTT TTT                | 42 |
| GTC GAA CGC AAG GAT ATA GGG AGA ACA TAC GAG CCG GAA GCA TAT TTT TTT TT | 53 |
| TCG GCC CTG AAT AAA GCC TCA GAG CAT AAT TTT TTT TT                     | 38 |
| TTT TTT TTT CCA GTG CCA CAT TAT GAC TTT TTT TTT                        | 36 |
| TTT TTT TTT AGC GGT CCA CGC AGT GTT GTT CCA TTT TTT TTT                | 42 |
| TTT TTT TTT CTC ACT GCC CGC TCT TTT CAC CAG TTT TTT TTT                | 42 |
| TTT TTT TTT CCT GTT TAG GCT GCT CAT TTT TTT TTT                        | 36 |
| TTT TTT TTT CCA TAT TTA ACA TAC AAT TTT TTT TTT TTT                    | 39 |
| TTT TTT TTT CAC CAC CCT CAT TTT CCC GCC ACA GAG CCA CAA G              | 43 |
| TTT TTT TTT GAT AAG TGC CGT CGA GTG CTC AGG TTT TCA CAA AAT CCC C      | 49 |
| TTT TTT TTT CAA AGA ACG CGA ACT GAA CAC TTT TTT TTT                    | 39 |
| TAA GTT AGA TTG AAT CCT GTC GCT AGG AAA TAC CTA CAT TTT GAT TTT TTT TT | 53 |
| TTT TTT TTT CTA CAA CGC CTG TAG CTC GTC ACA ACC GAT CAC C              | 43 |
| TTT TTT TTT GAA ACA TGA AAG TAT TCG GAA CCA CCG CCT CAG GAG GAC C      | 49 |
| TTT TTT TTT ACA TGG CTT TTG ATG ATT CCA GTT TGA TAT TCA C              | 43 |
| TTT TTT TTT AAC AAC TAA AGG AAT TGT GTA CCA GCA GTC                    | 39 |
| TGA TAT AAT CCA GCA GAC ACC GCC TGC AAC AGT GCC TTT TTT TTT            | 45 |
| AAA TGA AAT GCG ACC AGT AAT AAA AGG GAT TTT TTT TT                     | 38 |
| TTT TTT TTT CAT TCT GGC CAA ATA TAC AGT TTT TTT TTT                    | 39 |
| TTT TTT TTT ATT CTG TCC AGA AGG CGT TTT TTT TTT TTT                    | 39 |
| TTT TTT TTT TTC ACG TTG AAA ATC TTT CGA AT                             | 32 |
| TTT TTT TTT ACG CTG AGA GCC AAC AAA GAA                                | 30 |
| AAT AAT TTT TTT TTT TTT                                                | 18 |
| TTT TTT TTT TGA TAC CGA GGT CGC TGA                                    | 27 |
| GTT TGG AAC AAG CAA AGG GCG AAA TTT TTT TTT                            | 33 |
| GCA ACT AAA GGT CAA TAA TTT TTT TTT                                    | 27 |

**Table 8.** 27-HG docking strand sequences.

| Sequences (5'-3')                                                       | #Bases |
|-------------------------------------------------------------------------|--------|
| TGA CAG AGA TAC ATC GCC ATT AAA AAT ACT TTT TTT TGT CGC ACA GC          | 47     |
| GCG TTT GCG GAG CAG CAG AGG AAG GTT ATC TAA AAT TTT TTT TTG TCG CAC AGC | 54     |
| TTT TTT TTT ATC TTT AGG AGC GAA GTA TTA TTT TTT TTG TCG CAC AGC         | 48     |
| TTT TTT TTT CGA ACG AAC CAC CTG ATT GTT TTT TTT TTG TCG CAC AGC         | 48     |
| TTT TTT TTT CGC TCA ATC GTC ATC GCG CAG TTT TTT TTG TCG CAC AGC         | 48     |
| TTT TTT TTT CTT CTG TAA ATC TGA AAA CAT TTT TTT TTG TCG CAC AGC         | 48     |
| TTT TTT TTT AGC GAT AGC CAG ATA GCC GAA TTT TTT TTG TCG CAC AGC         | 48     |
| TTT TTT TTT AAC AGT ACC CGA CCG TGT GAT TTT TTT TTG TCG CAC AGC         | 48     |
| TTT TTT TTT TGG ATT ATA AAT TGA GAA TCG TTT TTT TTG TCG CAC AGC         | 48     |
| TTT TTT TTT GAC TTT ACA AGA AAC CAA TCA TTT TTT TTG TCG CAC AGC         | 48     |
| TTT TTT TTT ATA ATC GGC TGT TTC ATC GTA TTT TTT TTG TCG CAC AGC         | 48     |
| TTT TTT TTT CAA AGT TAC CAG TAC CCA AAA TTT TTT TTG TCG CAC AGC         | 48     |
| TTT TTT TTT GAA CTG GCA AGA ATA GAA AGG TTT TTT TTG TCG CAC AGC         | 48     |
| TTT TTT TTT AAA TGA AAA ACC GAC TTG AGC TTT TTT TTG TCG CAC AGC         | 48     |
| TTT TTT TTT ATC CTG AAT GCC TTT AGC GTC TTT TTT TTG TCG CAC AGC         | 48     |

|                                                                                    |    |
|------------------------------------------------------------------------------------|----|
| TTT TTT TTT GGA ATC ATT TTG AGG CAG GTC TTT TTT TTG TCG CAC AGC                    | 48 |
| TTT TTT TTT AGA CGA TTG GCC AAG CGT CAT TTT TTT TTG TCG CAC AGC                    | 48 |
| TTT TTT TTT AGA CTG TAG CGC TAC CAG GCG TTT TTT TTG TCG CAC AGC                    | 48 |
| TTT TTT TTT AGG GCG ACA TTC CAG TAC AAA TTT TTT TTG TCG CAC AGC                    | 48 |
| CGA CAC GCT GTT TTT TTT TGA GAC GGG CAA AGA GTT GCA GCA TTT TTT TTT                | 51 |
| CGA CAC GCT GTT TTT TTT AAG TGT AAA GCC AAT TGC GTT GCG TTT TTT TTT                | 51 |
| CGA CAC GCT GTT TTT TTT CCT GTA ATA CTT TTG CCC AAA AAA GCT TGC CGT T              | 52 |
| CGA CAC GCT GTT TTT TTT TCG GTG CGG AAA CGA CGG TTT TTT TTT                        | 45 |
| CGA CAC GCT GTT TTT TTT GAT AGG TCA TTC CGG CAC TTT TTT TTT                        | 45 |
| CGA CAC GCT GTT TTT TTT ACA TTA AAT CCG TAA TGG TTT TTT TTT                        | 45 |
| CGA CAC GCT GTT TTT TTT CAT TAA ATT TTT GTT AAA TCT TCC TGA GTA                    | 48 |
| CGA CAC GCT GTT TTT TTT AGT CTG GAG CAA CCC CAA AAA CAG TTT TTT TTT                | 51 |
| CGA CAC GCT GTT TTT TTT CGG AGA GGG TAG TCA TTG CCT GAG TTT TTT TTT                | 51 |
| CGA CAC GCT GTT TTT TTT AGC TAA ATC GGT TGC AAT GCC TGA TTT TTT TTT                | 51 |
| CGA CAC GCT GTT TTT TTT TCA GTG AAT AAG GCT TTA ACA AAC TAT ATT CGC A              | 52 |
| CGA CAC GCT GTT TTT TTT ATC AGG TCT GAG GAA GCC TTT TTT TTT                        | 45 |
| CGA CAC GCT GTT TTT TTT AGC GTC CAA TAC TGC GGA AAC GAG AAG ACT ATT AAT            | 54 |
| CGA CAC GCT GTT TTT TTT CAG ATA CAT AAC AAA TAG CGA GAG TTT TTT TTT                | 51 |
| CGA CAC GCT GTT TTT TTT ATT ACA GGT AGA ATT CAA CTA ATG TTT TTT TTT                | 51 |
| CGA CAC GCT GTT TTT TTT ATT ACC CAA ATC TTT AAT CAT TGT TTT TTT TTT                | 51 |
| CGA CAC GCT GTT TTT TTT CAA CTT TGA AAG AGG AAG GGA ACG CTC CAT TAA A              | 52 |
| CGA CAC GCT GTT TTT TTT AGA GGC AAA TGT CGA AAT TTT TTT TTT                        | 45 |
| CGA CAC GCT GTT TTT TTT GGC TTG CAG AAA GAC TTT TTT TTT TTT                        | 45 |
| TTT TTT TTT AGG CGA ATT CCA ATC GCA AGA TTT TTT TTG TCG CAC AGC                    | 48 |
| TTT TTT TTT ACC ACC AGA AAA GGT AAA GTA TTT TTT TTG TCG CAC AGC                    | 48 |
| TTT TTT TTT CAT TTG GGA ATT CCT CAG AGC TTT TTT TTG TCG CAC AGC                    | 48 |
| TTT TTT TTT GCC ACC ACC GGA TAT TAT TCT TTT TTT TTG TCG CAC AGC                    | 48 |
| TTC CGC GAC GTA AAT AAG GCG TTT AAC GTC AAT TTT TTT TGT CGC ACA GC                 | 50 |
| TTC CGC GAC GTC CTG AAC AAG CCA AAG ACA AAT TTT TTT TGT CGC ACA GC                 | 50 |
| TTC CGC GAC GTA GCG AAC CTA CCG GAA CCA GAT TTT TTT TGT CGC ACA GC                 | 50 |
| CGA CAC GCT GTT TTT TTT GAA GAT TGT ATA TGT TAA AAT TCG TTT TTT TTT                | 51 |
| CGA CAC GCT GTT TTT TTT GTA ATG TGT AGG ATA AAT TAA TGC TTT TTT TTT                | 51 |
| CGA CAC GCT GTT TTT TTT CCG CGA CCT CGA ACT GAC TTT TTT TTT                        | 45 |
| CGA CAC GCT GTT TTT TTT TTC ATG AGG TAA AAC GAA TTT TTT TTT                        | 45 |
| CGA CAC GCT GTT TTT TTT GGT CAT TTT TTT AAA TAT TGC AGC GCC TT                     | 47 |
| CGA CAC GCT GTT TTT TTT GCT TTT GCA AAA TTT AGA CTG GAT TGC AGC GCC TT             | 53 |
| CGA CAC GCT GTT TTT TTT GAA TTA CCT TAT CGG AAC AAC ATT TGC AGC GCC TT             | 53 |
| TAT TCG CTC ATT TAA TTA TCA ATA TAT GTG AGT GAA TAA CCT TGT TTT TTT TGT CGC ACA GC | 62 |
| CGA CAC GCT GTT TTT TTT AAC CGT CTA TCA TTG ATT AGT AAT AAG TGG                    | 48 |

**Table 9.** 36-HG poly-T staple sequences.

| Sequences (5'-3')                                         | #Bases |
|-----------------------------------------------------------|--------|
| GGT GGA TTG AGT GAG CGT AGC CAG CTT TCA TCA TTT TTT TTT   | 42     |
| ATA AGA TTA ATT ACC CTT GAC CAT AAA TCA AAA TTT TTT TTT   | 42     |
| ATA CAG ATG ATG ACA AGA ACC GGA TAT TCT TTT TTT TT        | 38     |
| TTA TAT ATT CTA GTT GCA ATT TCT TAA ACA GCT TTT TTT TTT   | 42     |
| TCG GCC CTG AAT AAA GCC TCA GAG CAT AAT TTT TTT TT        | 38     |
| TTT TTT TTT CAC CAC CCT CAT TTT CCC GCC ACA GAG CCA CAA G | 43     |



|                                                                   |    |
|-------------------------------------------------------------------|----|
| TTT TTT TTT GAT AAG TGC CGT CGA GTG CTC AGG TTT TCA CAA AAT CCC C | 49 |
| TTT TTT TTT CTA CAA CGC CTG TAG CTC GTC ACA ACC GAT CAC C         | 43 |
| TTT TTT TTT GAA ACA TGA AAG TAT TCG GAA CCA CCG CCT CAG GAG GAC C | 49 |
| TTT TTT TTT ACA TGG CTT TTG ATG ATT CCA GTT TGA TAT TCA C         | 43 |
| TTT TTT TTT AAC AAC TAA AGG AAT TGT GTA CCA GCA GTC               | 39 |
| TTT TTT TTT TTC ACG TTG AAA ATC TTT CGA AT                        | 32 |
| AAT AAT TTT TTT TTT TTT                                           | 18 |
| TTT TTT TTT TGA TAC CGA GGT CGC TGA                               | 27 |

**Table 10.** 36-HG docking strand sequences.

| Sequences (5'-3')                                                       | #Bases |
|-------------------------------------------------------------------------|--------|
| AAA TGA AAT GCG ACC AGT AAT AAA AGG GAT TTT TTT TGT CGC ACA GC          | 47     |
| TGA CAG AGA TAC ATC GCC ATT AAA AAT ACT TTT TTT TGT CGC ACA GC          | 47     |
| GCG TTT GCG GAG CAG CAG AGG AAG GTT ATC TAA AAT TTT TTT TTG TCG CAC AGC | 54     |
| TTT TTT TTT ATC TTT AGG AGC GAA GTA TTA TTT TTT TTG TCG CAC AGC         | 48     |
| TTT TTT TTT CGA ACG AAC CAC CTG ATT GTT TTT TTT TTG TCG CAC AGC         | 48     |
| TTT TTT TTT CGC TCA ATC GTC ATC GCG CAG TTT TTT TTG TCG CAC AGC         | 48     |
| TTT TTT TTT CTT CTG TAA ATC TGA AAA CAT TTT TTT TTG TCG CAC AGC         | 48     |
| TTT TTT TTT AGC GAT AGC CAG ATA GCC GAA TTT TTT TTG TCG CAC AGC         | 48     |
| TTT TTT TTT AAC AGT ACC CGA CCG TGT GAT TTT TTT TTG TCG CAC AGC         | 48     |
| TTT TTT TTT TGG ATT ATA AAT TGA GAA TCG TTT TTT TTG TCG CAC AGC         | 48     |
| TTT TTT TTT GAC TTT ACA AGA AAC CAA TCA TTT TTT TTG TCG CAC AGC         | 48     |
| TTT TTT TTT ATA ATC GGC TGT TTC ATC GTA TTT TTT TTG TCG CAC AGC         | 48     |
| TTT TTT TTT CCA TAT TTA ACA TAC AAT TTT TTT TTT TTG TCG CAC AGC         | 48     |
| TTT TTT TTT CAA AGA ACG CGA ACT GAA CAC TTT TTT TTG TCG CAC AGC         | 48     |
| TTT TTT TTT CAA AGT TAC CAG TAC CCA AAA TTT TTT TTG TCG CAC AGC         | 48     |
| TTT TTT TTT GAA CTG GCA AGA ATA GAA AGG TTT TTT TTG TCG CAC AGC         | 48     |
| TTT TTT TTT AAA TGA AAA ACC GAC TTG AGC TTT TTT TTG TCG CAC AGC         | 48     |
| TTT TTT TTT ATC CTG AAT GCC TTT AGC GTC TTT TTT TTG TCG CAC AGC         | 48     |
| TTT TTT TTT GGA ATC ATT TTG AGG CAG GTC TTT TTT TTG TCG CAC AGC         | 48     |
| TTT TTT TTT AGA CGA TTG GCC AAG CGT CAT TTT TTT TTG TCG CAC AGC         | 48     |
| TTT TTT TTT AGA CTG TAG CGC TAC CAG GCG TTT TTT TTG TCG CAC AGC         | 48     |
| TTT TTT TTT AGG GCG ACA TTC CAG TAC AAA TTT TTT TTG TCG CAC AGC         | 48     |
| CGA CAC GCT GTT TTT TTT AGC GGT CCA CGC AGT GTT GTT CCA TTT TTT TTT     | 51     |
| CGA CAC GCT GTT TTT TTT TGA GAC GGG CAA AGA GTT GCA GCA TTT TTT TTT     | 51     |
| CGA CAC GCT GTT TTT TTT AAG TGT AAA GCC AAT TGC GTT GCG TTT TTT TTT     | 51     |
| CGA CAC GCT GTT TTT TTT CCT GTA ATA CTT TTG CCC AAA AAA GCT TGC CGT T   | 52     |
| CGA CAC GCT GTT TTT TTT TCG GTG CGG AAA CGA CGG TTT TTT TTT             | 45     |
| CGA CAC GCT GTT TTT TTT GAT AGG TCA TTC CGG CAC TTT TTT TTT             | 45     |
| CGA CAC GCT GTT TTT TTT ACA TTA AAT CCG TAA TGG TTT TTT TTT             | 45     |
| CGA CAC GCT GTT TTT TTT CAT TAA ATT TTT GTT AAA TCT TCC TGA GTA         | 48     |
| CGA CAC GCT GTT TTT TTT AGT CTG GAG CAA CCC CAA AAA CAG TTT TTT TTT     | 51     |
| CGA CAC GCT GTT TTT TTT CGG AGA GGG TAG TCA TTG CCT GAG TTT TTT TTT     | 51     |
| CGA CAC GCT GTT TTT TTT AGC TAA ATC GGT TGC AAT GCC TGA TTT TTT TTT     | 51     |
| CGA CAC GCT GTT TTT TTT TCA GTG AAT AAG GCT TTA ACA AAC TAT ATT CGC A   | 52     |
| CGA CAC GCT GTT TTT TTT GCA ACT AAA GGT CAA TAA TTT TTT TTT             | 45     |
| CGA CAC GCT GTT TTT TTT CGA AAG ACT TTG ATA AGA TTT TTT TTT             | 45     |
| CGA CAC GCT GTT TTT TTT ATC AGG TCT GAG GAA GCC TTT TTT TTT             | 45     |

|                                                                                       |    |
|---------------------------------------------------------------------------------------|----|
| CGA CAC GCT GTT TTT TTT AGC GTC CAA TAC TGC GGA AAC GAG AAG ACT ATT AAT               | 54 |
| CGA CAC GCT GTT TTT TTT CAG ATA CAT AAC AAA TAG CGA GAG TTT TTT TTT                   | 51 |
| CGA CAC GCT GTT TTT TTT ATT ACA GGT AGA ATT CAA CTA ATG TTT TTT TTT                   | 51 |
| CGA CAC GCT GTT TTT TTT ATT ACC CAA ATC TTT AAT CAT TGT TTT TTT TTT                   | 51 |
| CGA CAC GCT GTT TTT TTT CAA CTT TGA AAG AGG AAG GGA ACG CTC CAT TAA A                 | 52 |
| CGA CAC GCT GTT TTT TTT AGA GGC AAA TGT CGA AAT TTT TTT TTT                           | 45 |
| CGA CAC GCT GTT TTT TTT GGC TTG CAG AAA GAC TTT TTT TTT TTT                           | 45 |
| TAA GTT AGA TTG AAT CCT GTC GCT AGG AAA TAC CTA CAT TTT GAT TTT TTT TGT CGC<br>ACA GC | 62 |
| TGA TAT AAT CCA GCA GAC ACC GCC TGC AAC AGT GCC TTT TTT TTG TCG CAC AGC               | 54 |
| TTT TTT TTT ACG CTG AGA GCC AAC AAA GAA TTT TTT TTG TCG CAC AGC                       | 48 |
| TTT TTT TTT AGG CGA ATT CCA ATC GCA AGA TTT TTT TTG TCG CAC AGC                       | 48 |
| TTT TTT TTT ACC ACC AGA AAA GGT AAA GTA TTT TTT TTG TCG CAC AGC                       | 48 |
| TTT TTT TTT ATT CTG TCC AGA AGG CGT TTT TTT TTT TTG TCG CAC AGC                       | 48 |
| TTT TTT TTT CAT TTG GGA ATT CCT CAG AGC TTT TTT TTG TCG CAC AGC                       | 48 |
| TTT TTT TTT GCC ACC ACC GGA TAT TAT TCT TTT TTT TTG TCG CAC AGC                       | 48 |
| TTC CGC GAC GTC ATT CTG GCC AAA TAT ACA GTT TTT TTT TGT CGC ACA GC                    | 50 |
| TTC CGC GAC GTA AAT AAG GCG TTT AAC GTC AAT TTT TTT TGT CGC ACA GC                    | 50 |
| TTC CGC GAC GTC CTG AAC AAG CCA AAG ACA AAT TTT TTT TGT CGC ACA GC                    | 50 |
| TTC CGC GAC GTA GCG AAC CTA CCG GAA CCA GAT TTT TTT TGT CGC ACA GC                    | 50 |
| CGA CAC GCT GTT TTT TTT GTT TGG AAC AAG CAA AGG GCG AAA TTT TTT TTT                   | 51 |
| CGA CAC GCT GTT TTT TTT CTC ACT GCC CGC TCT TTT CAC CAG TTT TTT TTT                   | 51 |
| CGA CAC GCT GTT TTT TTT CCA GTG CCA CAT TAT GAC TTT TTT TTT                           | 45 |
| CGA CAC GCT GTT TTT TTT GAA GAT TGT ATA TGT TAA AAT TCG TTT TTT TTT                   | 51 |
| CGA CAC GCT GTT TTT TTT GTA ATG TGT AGG ATA AAT TAA TGC TTT TTT TTT                   | 51 |
| CGA CAC GCT GTT TTT TTT CCT GTT TAG GCT GCT CAT TTT TTT TTT                           | 45 |
| CGA CAC GCT GTT TTT TTT CCG CGA CCT CGA ACT GAC TTT TTT TTT                           | 45 |
| CGA CAC GCT GTT TTT TTT TTC ATG AGG TAA AAC GAA TTT TTT TTT                           | 45 |
| CGA CAC GCT GTT TTT TTT CGC TTC TGG GAA GGG CGA TGC AGC GCC TT                        | 47 |
| CGA CAC GCT GTT TTT TTT GGT CAT TTT TTT AAA TAT TGC AGC GCC TT                        | 47 |
| CGA CAC GCT GTT TTT TTT GCT TTT GCA AAA TTT AGA CTG GAT TGC AGC GCC TT                | 53 |
| CGA CAC GCT GTT TTT TTT GAA TTA CCT TAT CGG AAC AAC ATT TGC AGC GCC TT                | 53 |
| TAT TCG CTC ATT TAA TTA TCA ATA TAT GTG AGT GAA TAA CCT TGT TTT TTT TGT CGC ACA<br>GC | 62 |
| CGA CAC GCT GTT TTT TTT AAC CGT CTA TCA TTG ATT AGT AAT AAG TGG                       | 48 |

- [1] R. Ji, J. Cheng, T. Yang, C. C. Song, L. Li, F. S. Du, Z. C. Li, *Biomacromolecules* **2014**, *15*, 3531-3539.  
[2] J. Jin, E. G. Baker, C. W. Wood, J. Bath, D. N. Woolfson, A. J. Turberfield, *ACS Nano* **2019**.
